# Supplementary material for: Synthesis, gene transfection efficiency, and serum compatibility of β-sitosterol-based cationic lipids with different headgroups
Source: Royal Society of Chemistry journal article supplement (doi:10.1039/d3nj02503a), 2023-01-01
Supplement: d3nj02503a1.pdf [file d3nj02503a1.pdf]

## Supplementary material

### **Synthesis, gene transfection efficiency, and serum compatibility of $\beta$ -sitosterol-based cationic lipids with different headgroups**

Chopaka Thongbamrer, <sup>a,b</sup> Boon-ek Yingyongnarongkul, <sup>b</sup> Uthai Sakee, <sup>a</sup> Wang Nguitragee <sup>c,d</sup>  
and Widchaya Radchatawedchakoon <sup>\*a</sup>

<sup>a</sup> Creative Chemistry and Innovation Research Unit, Department of Chemistry and Center of Excellence for Innovation in Chemistry (PERCH-CIC), Faculty of Science, Mahasarakham University, Kantharawichai, Maha Sarakham, 44150 Thailand

<sup>b</sup> Department of Chemistry and Center of Excellence for Innovation in Chemistry (PERCH-CIC), Faculty of Science, Ramkhamhaeng University, Bangkapi, Bangkok, 10240 Thailand

<sup>c</sup> Department of Molecular Tropical Medicine and Genetics, Faculty of Tropical Medicine, Mahidol University, Bangkok, 10400 Thailand

<sup>d</sup> Mahidol Vivax Research Unit, Faculty of Tropical Medicine, Mahidol University, Bangkok, 10400 Thailand

\* Corresponding author. Tel.: +6643 754 246; fax: +6643 754 246.

E-mail addresses: widchaya.r@msu.ac.th; widchaya@hotmail.com

# $^1\text{H}$ , $^{13}\text{C}$ NMR and HR-ESI-MS Spectra of All Synthesized Compounds

WR-NMR178 Chopaka CT(1)-58 (7.8 mg,  $\text{CDCl}_3$ )

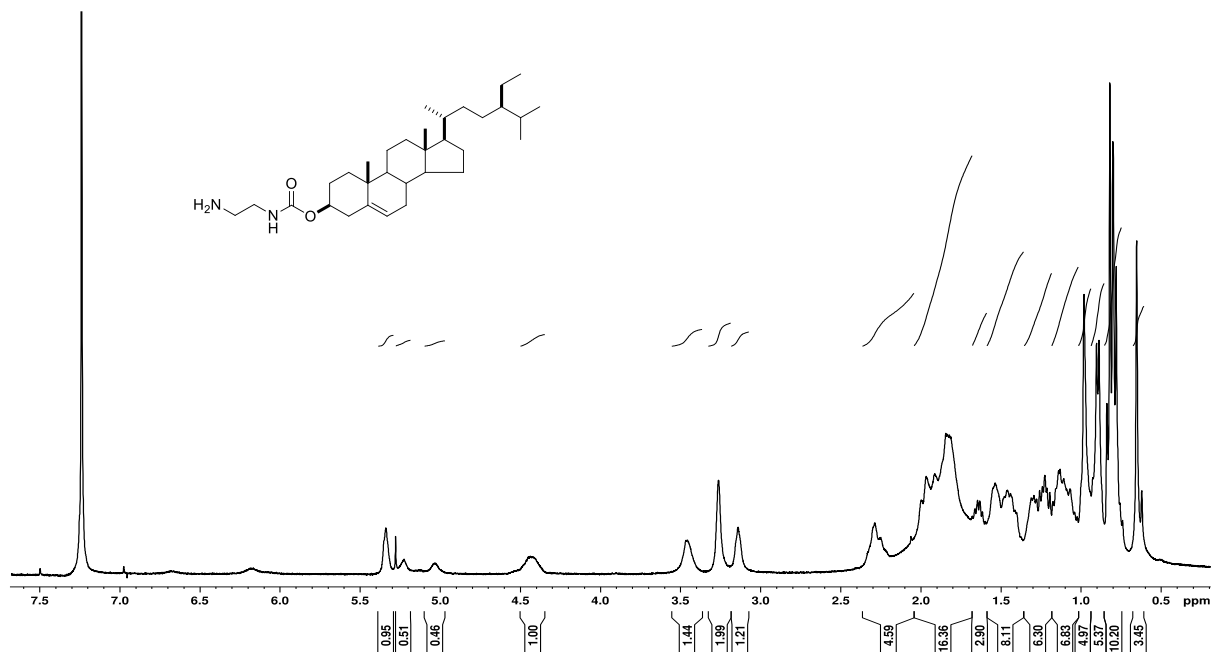

$^1\text{H}$  NMR Spectrum (400 MHz,  $\text{CDCl}_3$ ) of 3β-[N-(2-Aminoethyl)carbamoyl]β-sitosterol (1A)

$^{13}\text{C}$  WR-NMR178 Chopaka CT(1)-58 (7.8 mg,  $\text{CDCl}_3$ )

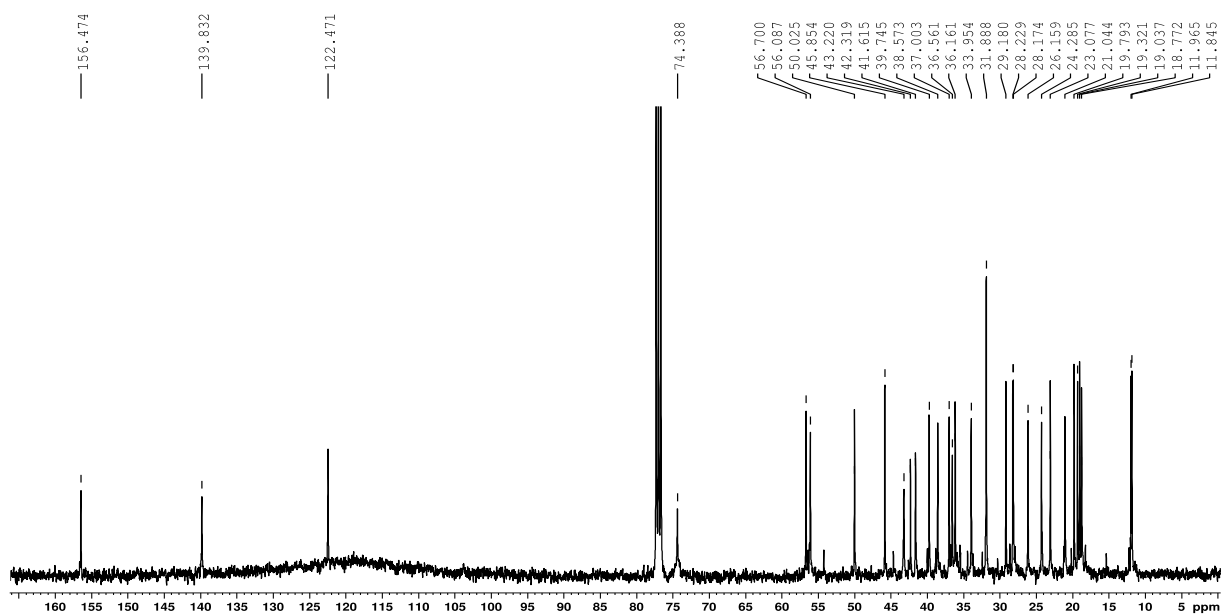

$^{13}\text{C}$  NMR Spectrum (100 MHz,  $\text{CDCl}_3$ ) of 3β-[N-(2-Aminoethyl)carbamoyl]β-sitosterol (1A)

## Mass Spectrum SmartFormula Report

### Analysis Info

Analysis Name D:\Data\Boon-ek\ESI\BY-HRMS 189 (pos).d  
Method tune\_wide2.m  
Sample Name CT(1)-58  
Comment

Acquisition Date 6/29/2016 3:32:56 PM

Operator RU  
Instrument micrOTOF 8213750.10411

### Acquisition Parameter

|             |            |                      |          |                  |           |
|-------------|------------|----------------------|----------|------------------|-----------|
| Source Type | ESI        | Ion Polarity         | Positive | Set Nebulizer    | 0.5 Bar   |
| Focus       | Not active |                      |          | Set Dry Heater   | 180 °C    |
| Scan Begin  | 50 m/z     | Set Capillary        | 4500 V   | Set Dry Gas      | 4.0 l/min |
| Scan End    | 3000 m/z   | Set End Plate Offset | -500 V   | Set Divert Valve | Waste     |

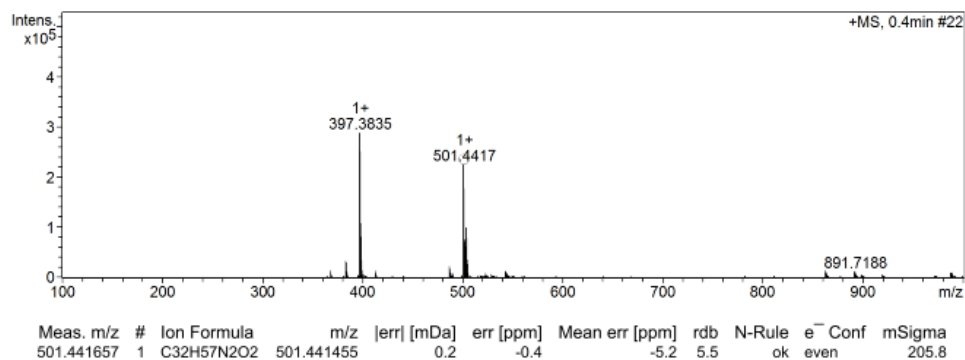

HR-ESI-MS Spectrum of 3 $\beta$ -[N-(2-Aminoethyl)carbamoyl] $\beta$ -sitosterol (**1A**)

WR-NMR179 Chopaka CT(1)-59 (8.6 mg, CDCl<sub>3</sub>)

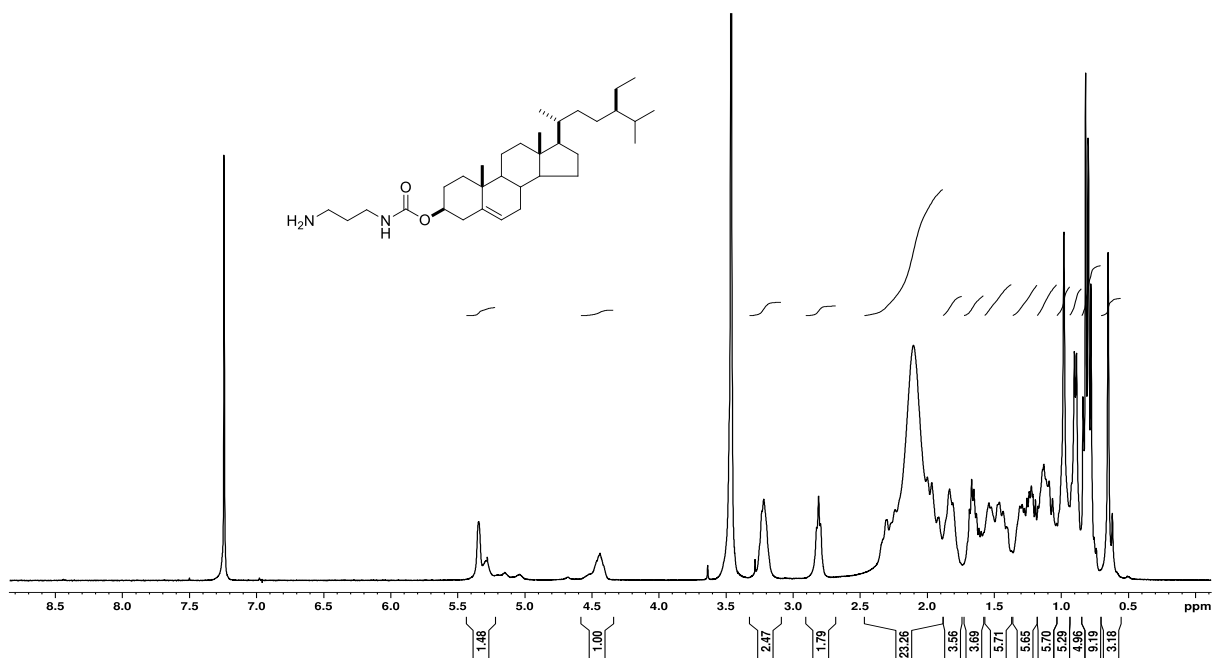

<sup>1</sup>H NMR Spectrum (400 MHz, CDCl<sub>3</sub>) of 3β-[N-(3-Aminopropyl)carbamoyl]β-sitosterol (**5A**)

<sup>13</sup>C WR-NMR179 Chopaka CT(1)-59 (8.6 mg, CDCl<sub>3</sub>)

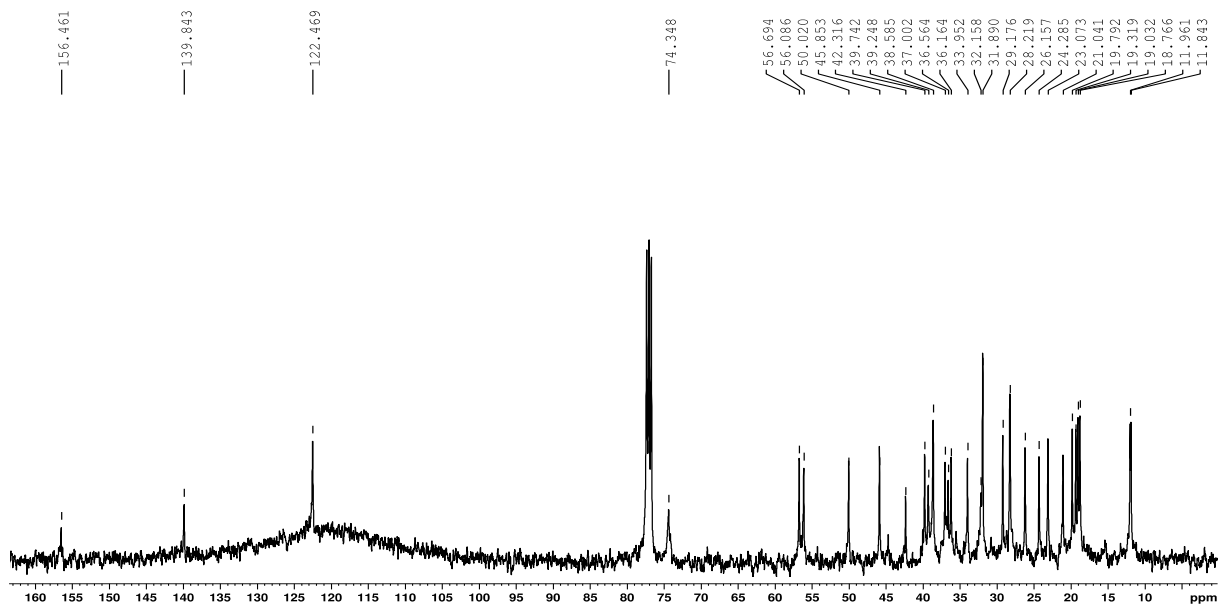

<sup>13</sup>C NMR Spectrum (100 MHz, CDCl<sub>3</sub>) of 3β-[N-(3-Aminopropyl)carbamoyl]β-sitosterol (**5A**)

## Mass Spectrum SmartFormula Report

### Analysis Info

Analysis Name D:\Data\Boon-ek\ESI\BY-HRMS 190 (pos).d  
Method tune\_wide2.m  
Sample Name CT (1)-59  
Comment

Acquisition Date 6/29/2016 3:36:37 PM

Operator RU  
Instrument micrOTOF 8213750.10411

### Acquisition Parameter

|             |            |                      |          |                  |           |
|-------------|------------|----------------------|----------|------------------|-----------|
| Source Type | ESI        | Ion Polarity         | Positive | Set Nebulizer    | 0.5 Bar   |
| Focus       | Not active |                      |          | Set Dry Heater   | 180 °C    |
| Scan Begin  | 50 m/z     | Set Capillary        | 4500 V   | Set Dry Gas      | 4.0 l/min |
| Scan End    | 3000 m/z   | Set End Plate Offset | -500 V   | Set Divert Valve | Waste     |

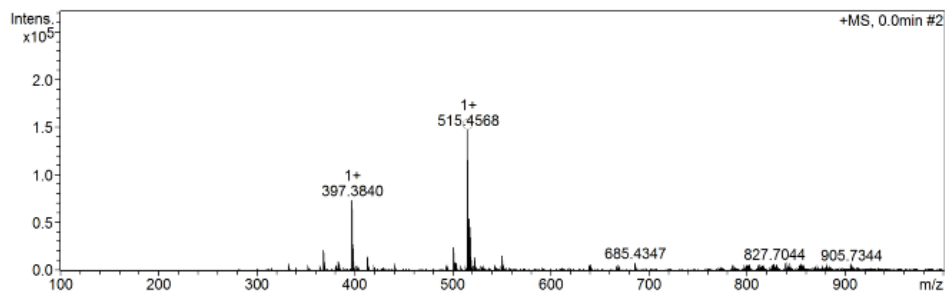

| Meas. m/z  | # | Ion Formula | m/z        | err  [mDa] | err [ppm] | Mean err [ppm] | rdb | N-Rule | e <sup>-</sup> Conf | mSigma |
|------------|---|-------------|------------|------------|-----------|----------------|-----|--------|---------------------|--------|
| 515.456794 | 1 | C33H59N2O2  | 515.457106 | 0.3        | 0.6       | -3.4           | 5.5 | ok     | even                | 127.1  |

HR-ESI-MS Spectrum of 3 $\beta$ -[N-(3-Aminopropyl)carbamoyl] $\beta$ -sitosterol (**5A**)

WR-NMR184 Chopaka CT(1)-64 (8.4 mg, CDCl<sub>3</sub> + CD<sub>3</sub>OD)

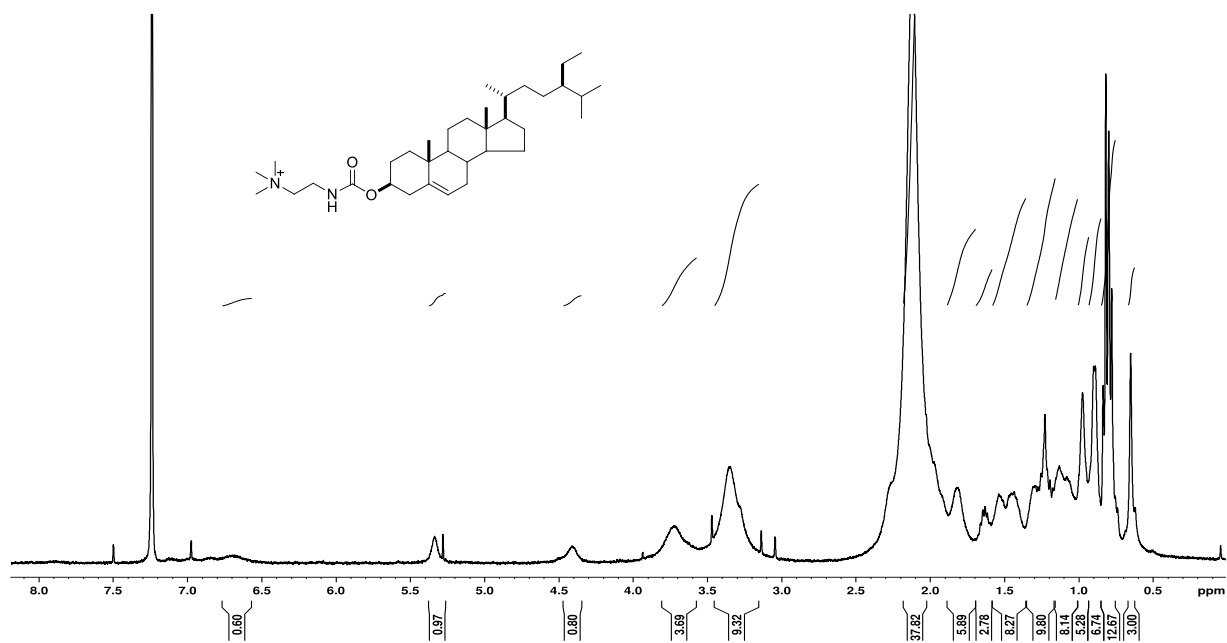

<sup>1</sup>H NMR Spectrum (400 MHz, CDCl<sub>3</sub>) of 3β-[N-(2-(*N,N,N*-Trimethyl)aminoethyl)carbamoyl]β-sitosterol (**2A**)

<sup>13</sup>C WR-NMR184 Chopaka CT(1)-64 (8.4 mg, CDCl<sub>3</sub> + CD<sub>3</sub>OD)

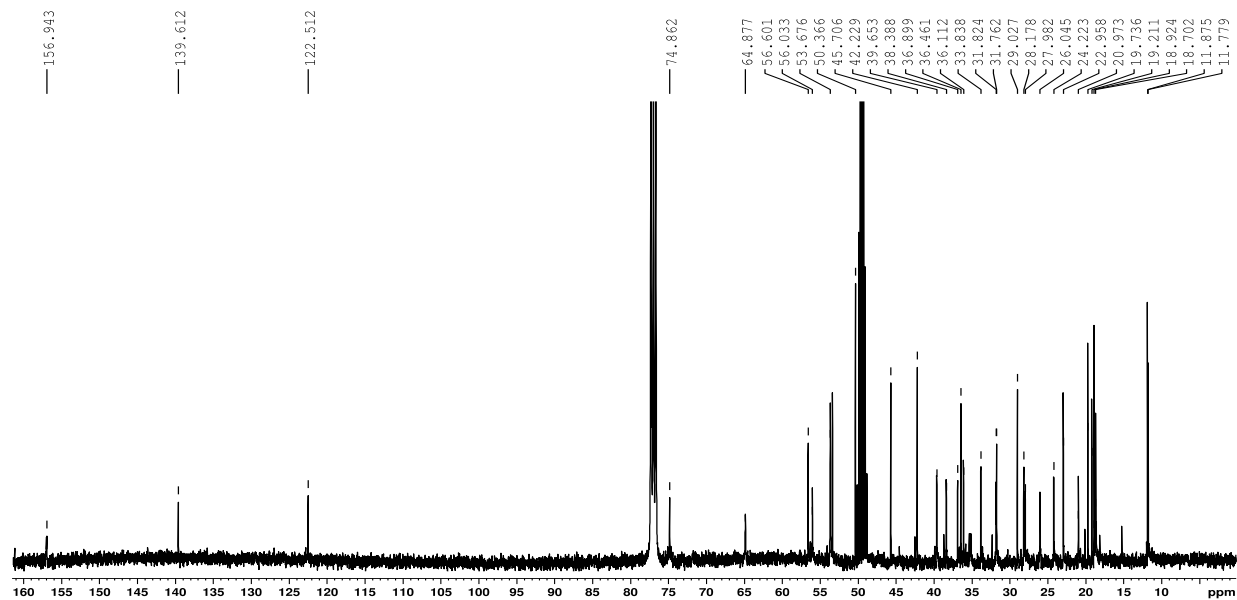

<sup>13</sup>C NMR Spectrum (100 MHz, CDCl<sub>3</sub>) of 3β-[N-(2-(*N,N,N*-Trimethyl)aminoethyl)carbamoyl]β-sitosterol (**2A**)

## Mass Spectrum SmartFormula Report

### Analysis Info

Analysis Name D:\Data\Boon-ek\ESI\BY-HRMS 198 (pos).d  
Method tune\_wide2.m  
Sample Name CT (1)-64  
Comment

Acquisition Date 6/29/2016 4:37:25 PM

Operator RU  
Instrument micrOTOF 8213750.10411

### Acquisition Parameter

|             |            |                      |          |                  |           |
|-------------|------------|----------------------|----------|------------------|-----------|
| Source Type | ESI        | Ion Polarity         | Positive | Set Nebulizer    | 0.5 Bar   |
| Focus       | Not active |                      |          | Set Dry Heater   | 180 °C    |
| Scan Begin  | 50 m/z     | Set Capillary        | 4500 V   | Set Dry Gas      | 4.0 l/min |
| Scan End    | 3000 m/z   | Set End Plate Offset | -500 V   | Set Divert Valve | Waste     |

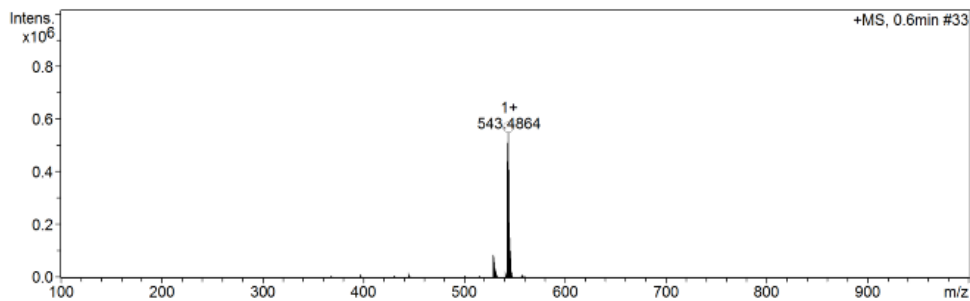

| Meas. m/z  | # | Ion Formula                                                   | m/z        | err  [mDa] | err [ppm] | Mean err [ppm] | rdb | N-Rule | e <sup>-</sup> Conf | mSigma |
|------------|---|---------------------------------------------------------------|------------|------------|-----------|----------------|-----|--------|---------------------|--------|
| 543.486402 | 1 | C <sub>35</sub> H <sub>63</sub> N <sub>2</sub> O <sub>2</sub> | 543.488406 | 2.0        | -3.7      | 2.5            | 5.5 | ok     | even                | 55.8   |

HR-ESI-MS Spectrum of 3 $\beta$ -[*N*-(2-(*N*', *N*', *N*'-Trimethyl)aminoethyl)carbonyl] $\beta$ -sitosterol (**2A**)

WR-NMR185 Chopaka CT(1)-65 (9.2 mg, CDCl<sub>3</sub> + CD<sub>3</sub>OD)

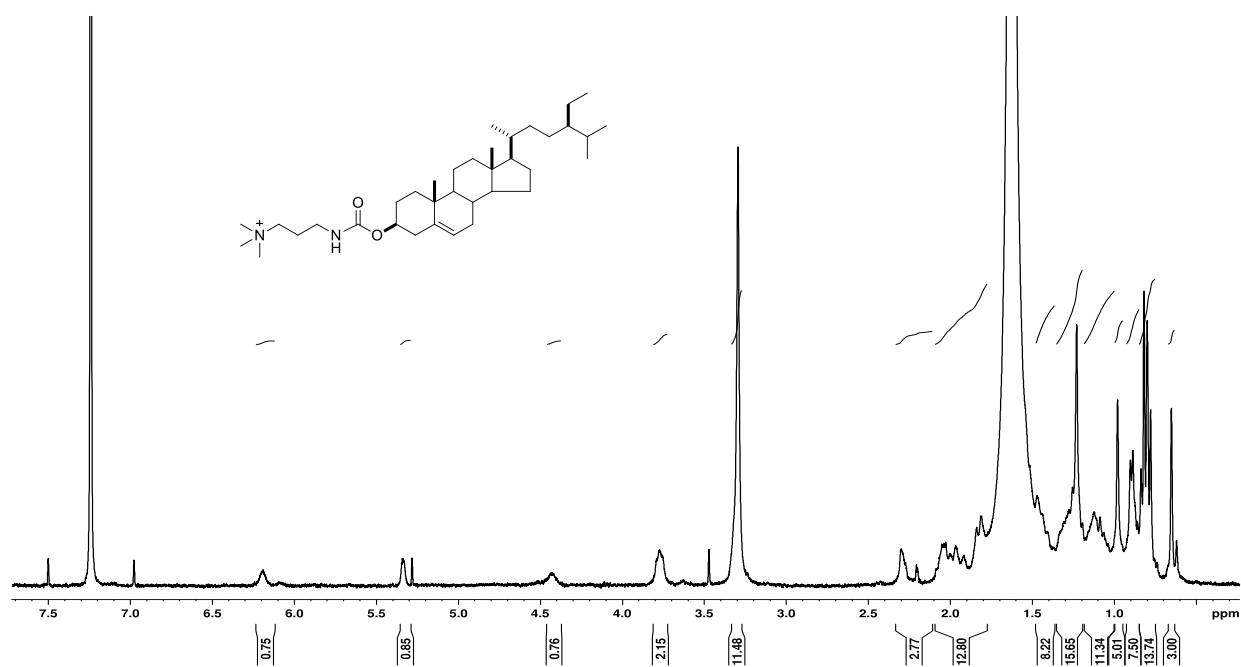

<sup>1</sup>H NMR Spectrum (400 MHz, CDCl<sub>3</sub>) of 3β-[N-(3-(N', N', N'-Trimethyl)aminopropyl)carbamoyl]β-sitosterol (**6A**)

<sup>13</sup>C WR-NMR185 Chopaka CT(1)-65 (9.2 mg, CDCl<sub>3</sub> + CD<sub>3</sub>OD)

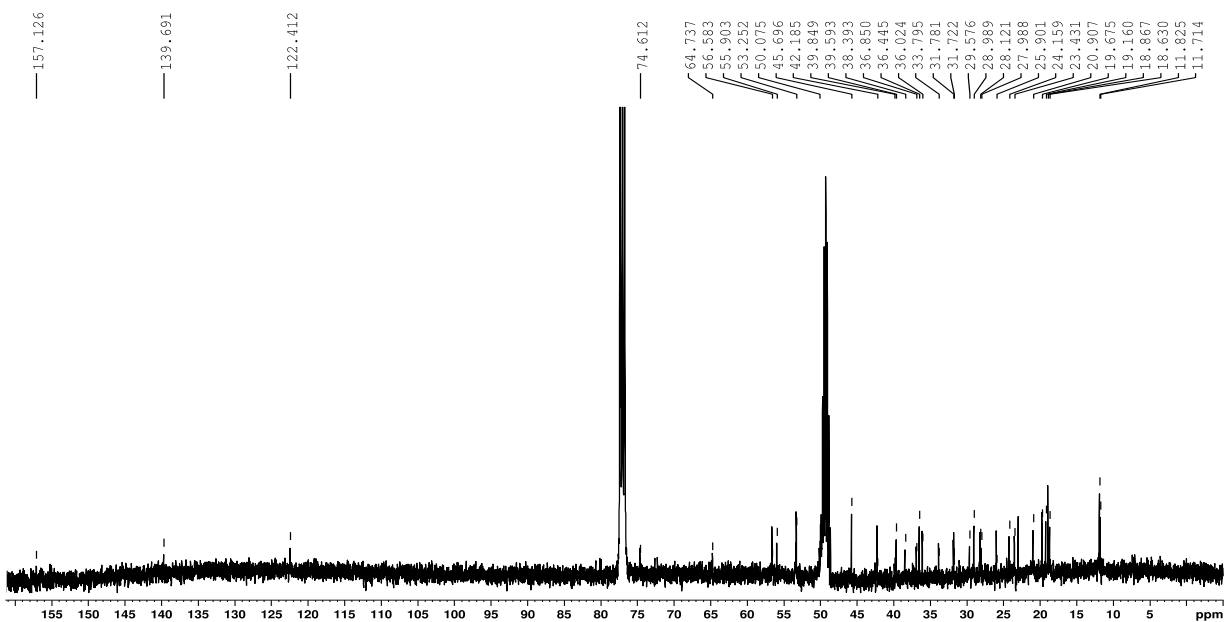

<sup>13</sup>C NMR Spectrum (100 MHz, CDCl<sub>3</sub>) of 3β-[N-(3-(N', N', N'-Trimethyl)aminopropyl)carbamoyl]β-sitosterol (**6A**)



## Mass Spectrum SmartFormula Report

### Analysis Info

Analysis Name D:\Data\Boon-ek\ESI\BY-HRMS 197 (pos).d  
Method tune\_wide2.m  
Sample Name CT (1)-65  
Comment

Acquisition Date 6/29/2016 4:33:53 PM

Operator RU  
Instrument micrOTOF 8213750.10411

### Acquisition Parameter

|             |            |                      |          |                  |           |
|-------------|------------|----------------------|----------|------------------|-----------|
| Source Type | ESI        | Ion Polarity         | Positive | Set Nebulizer    | 0.5 Bar   |
| Focus       | Not active |                      |          | Set Dry Heater   | 180 °C    |
| Scan Begin  | 50 m/z     | Set Capillary        | 4500 V   | Set Dry Gas      | 4.0 l/min |
| Scan End    | 3000 m/z   | Set End Plate Offset | -500 V   | Set Divert Valve | Waste     |

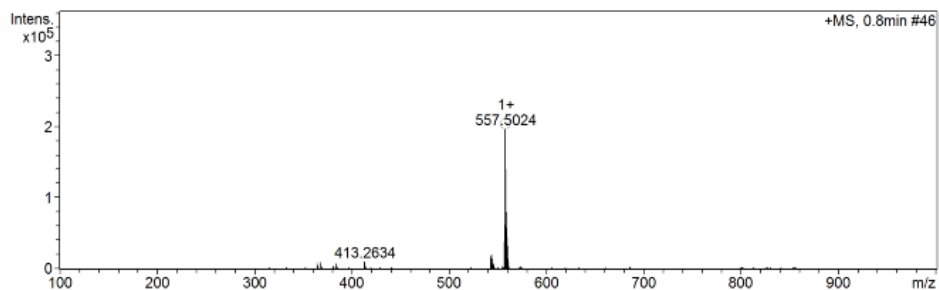

| Meas. m/z  | # | Ion Formula                                                   | m/z        | err  [mDa] | err [ppm] | Mean err [ppm] | rdb | N-Rule | e <sup>-</sup> Conf | mSigma |
|------------|---|---------------------------------------------------------------|------------|------------|-----------|----------------|-----|--------|---------------------|--------|
| 557.502370 | 1 | C <sub>36</sub> H <sub>65</sub> N <sub>2</sub> O <sub>2</sub> | 557.504056 | 1.7        | 3.0       | 1.8            | 5.5 | ok     | even                | 78.7   |

HR-ESI-MS Spectrum of 3 $\beta$ -[N-(3-(N', N', N'-Trimethyl)aminopropyl)carbamoyl] $\beta$ -sitosterol  
(6A)

WR-NMR180 Chopaka CT(1)-60 (20 mg, CDCl<sub>3</sub>)

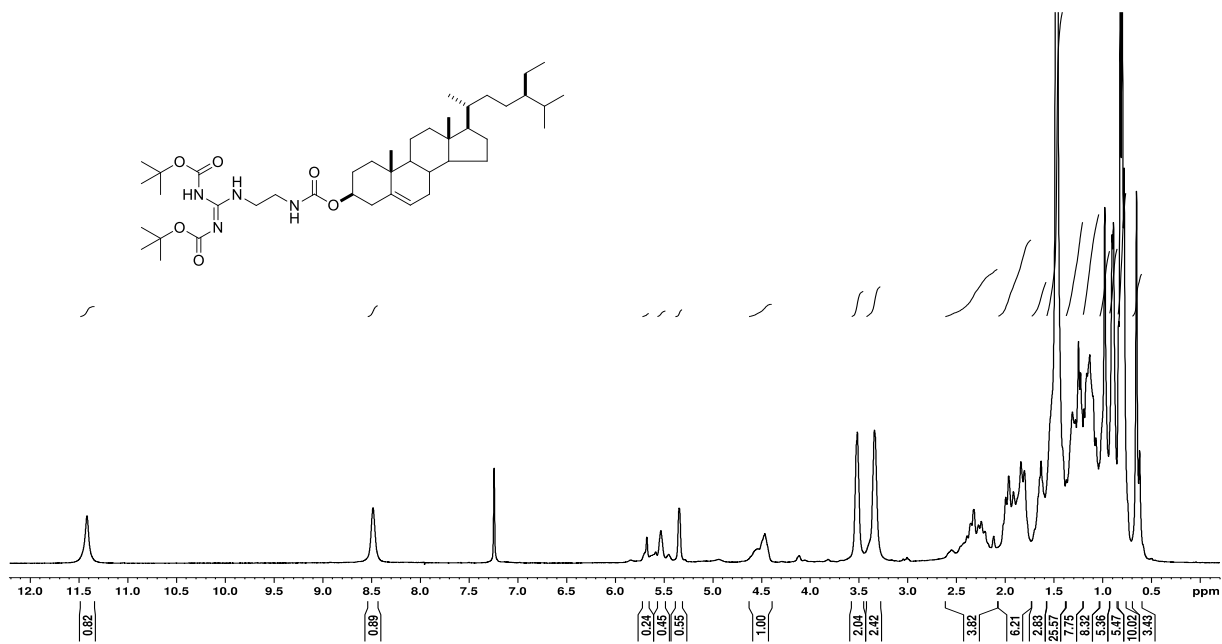

<sup>1</sup>H NMR Spectrum (400 MHz, CDCl<sub>3</sub>) of 3β-[(2-((N',N''-Di(*tert*-butoxycarbonyl)guanidiny)ethyl) carbamoyl]β-sitosterol (**11**)

<sup>13</sup>C WR-NMR180 Chopaka CT(1)-60 (20.0 mg, CDCl<sub>3</sub>)

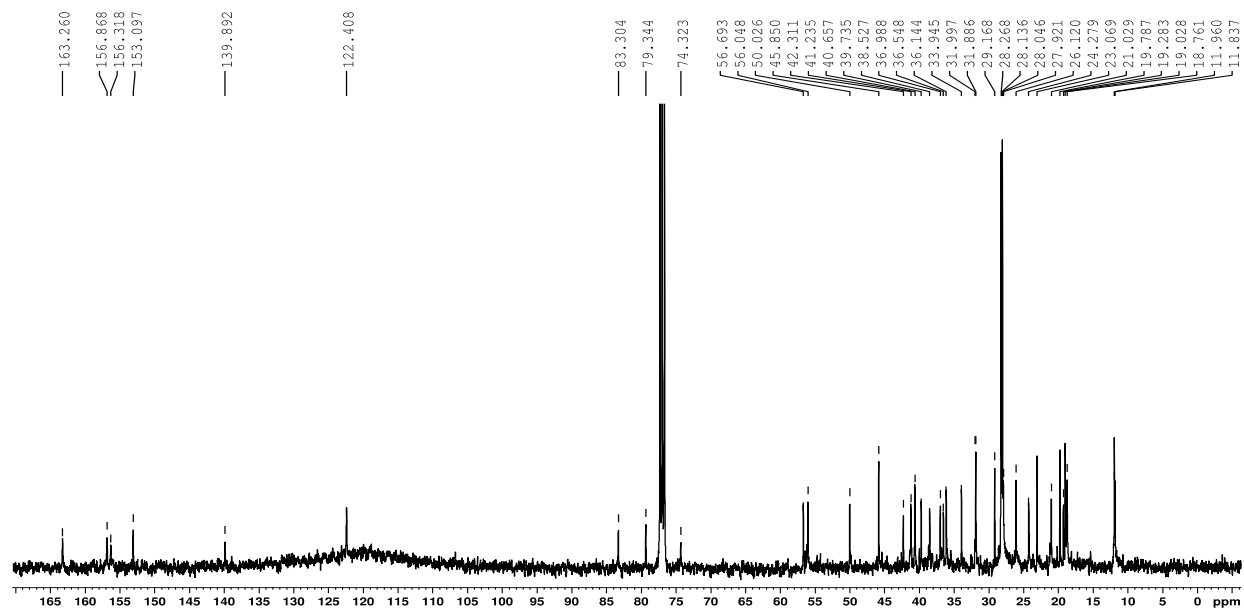

<sup>13</sup>C NMR Spectrum (100 MHz, CDCl<sub>3</sub>) of 3β-[(2-((N',N''-Di(*tert*-butoxycarbonyl)guanidiny)ethyl) carbamoyl]β-sitosterol (**11**)

## Mass Spectrum SmartFormula Report

|                      |                                         |                                       |
|----------------------|-----------------------------------------|---------------------------------------|
| <b>Analysis Info</b> |                                         | Acquisition Date 6/29/2016 3:40:48 PM |
| Analysis Name        | D:\Data\Boon-ek\ESI\BY-HRMS 191 (pos).d |                                       |
| Method               | tune_wide2.m                            | Operator RU                           |
| Sample Name          | CT (1)-60                               | Instrument micrOTOF 8213750.10411     |
| Comment              |                                         |                                       |

|                              |            |                      |          |                  |           |
|------------------------------|------------|----------------------|----------|------------------|-----------|
| <b>Acquisition Parameter</b> |            |                      |          |                  |           |
| Source Type                  | ESI        | Ion Polarity         | Positive | Set Nebulizer    | 0.5 Bar   |
| Focus                        | Not active |                      |          | Set Dry Heater   | 180 °C    |
| Scan Begin                   | 50 m/z     | Set Capillary        | 4500 V   | Set Dry Gas      | 4.0 l/min |
| Scan End                     | 3000 m/z   | Set End Plate Offset | -500 V   | Set Divert Valve | Waste     |

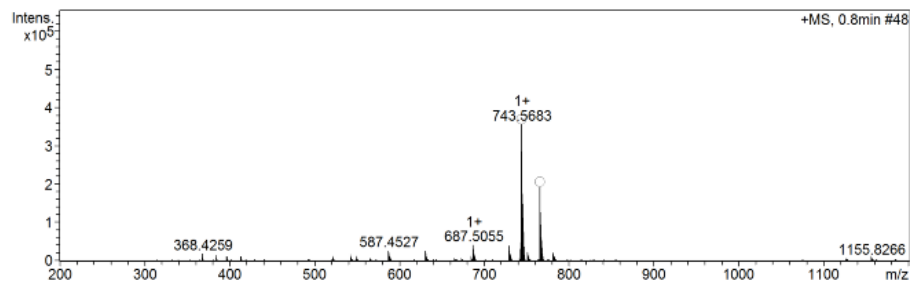

| Meas. m/z  | # | Ion Formula  | m/z        | [err] [mDa] | err [ppm] | Mean err [ppm] | rdb | N-Rule | e <sup>-</sup> Conf | mSigma |
|------------|---|--------------|------------|-------------|-----------|----------------|-----|--------|---------------------|--------|
| 743.568298 | 1 | C43H75N4O6   | 743.568113 | 0.2         | -0.2      | -1.7           | 8.5 | ok     | even                | 80.2   |
| 765.548899 | 1 | C43H74N4NaO6 | 765.550057 | 1.2         | -1.5      | 0.4            | 8.5 | ok     | even                | 75.0   |

HR-ESI-MS Spectrum of 3β-[(2-((*N'*, *N''*-Di(*tert*-butoxycarbonyl)guanidiny)ethyl) carbamoly]β-sitosterol (**11**)

WR-NMR181 Chopaka CT(1)-61 (12.5 mg, CDCl<sub>3</sub>)

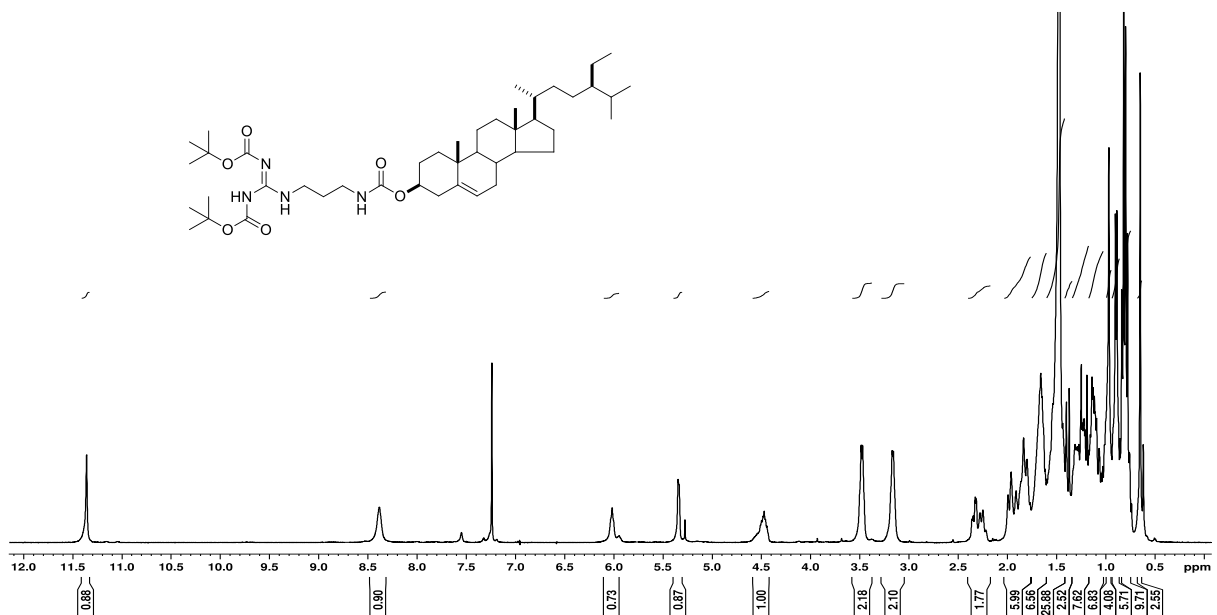

<sup>1</sup>H NMR Spectrum (400 MHz, CDCl<sub>3</sub>) of 3β-[(3-((N',N''-Di(tert-butoxycarbonyl))guanidiny)propyl)carbamoyl]β-sitosterol (**12**)

<sup>13</sup>C WR-NMR181 Chopaka CT(1)-61 (12.5 mg, CDCl<sub>3</sub>)

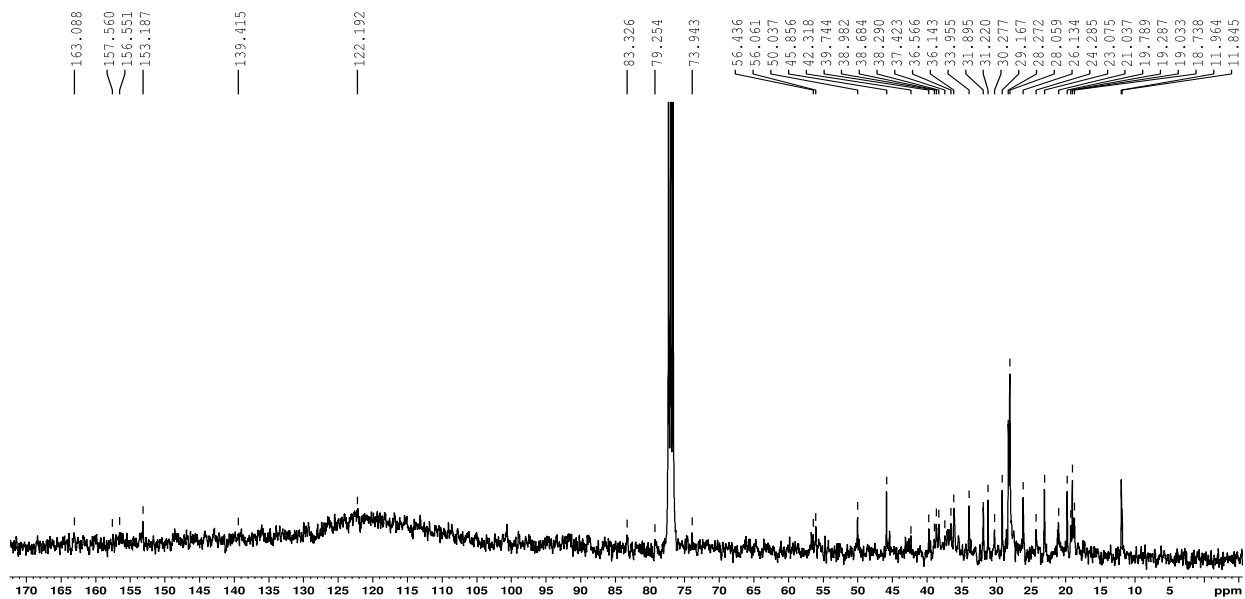

<sup>13</sup>C NMR Spectrum (100 MHz, CDCl<sub>3</sub>) of 3β-[(3-((N',N''-Di(tert-butoxycarbonyl))guanidiny)propyl)carbamoyl]β-sitosterol (**12**)

## Mass Spectrum SmartFormula Report

### Analysis Info

Analysis Name D:\Data\Boon-ek\ESI\BY-HRMS 192 (pos).d  
 Method tune\_wide2.m  
 Sample Name CT (1)-61  
 Comment

Acquisition Date 6/29/2016 3:46:20 PM

Operator RU  
 Instrument micrOTOF 8213750.10411

### Acquisition Parameter

|             |            |                      |          |                  |           |
|-------------|------------|----------------------|----------|------------------|-----------|
| Source Type | ESI        | Ion Polarity         | Positive | Set Nebulizer    | 0.5 Bar   |
| Focus       | Not active |                      |          | Set Dry Heater   | 180 °C    |
| Scan Begin  | 50 m/z     | Set Capillary        | 4500 V   | Set Dry Gas      | 4.0 l/min |
| Scan End    | 3000 m/z   | Set End Plate Offset | -500 V   | Set Divert Valve | Waste     |

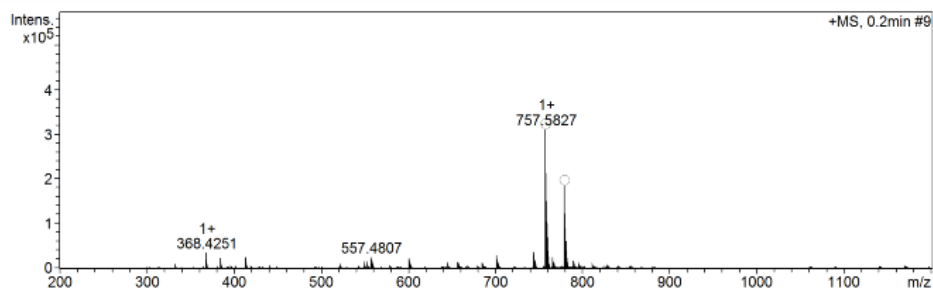

| Meas. m/z  | # | Ion Formula  | m/z        | [err] [mDa] | err [ppm] | Mean err [ppm] | rdb | N-Rule | e <sup>-</sup> Conf | mSigma |
|------------|---|--------------|------------|-------------|-----------|----------------|-----|--------|---------------------|--------|
| 757.582686 | 1 | C44H77N4O6   | 757.583763 | 1.1         | 1.4       | -1.0           | 8.5 | ok     | even                | 96.4   |
| 779.564673 | 1 | C44H76N4NaO6 | 779.565707 | 1.0         | -1.3      | -0.6           | 8.5 | ok     | even                | 95.2   |

HR-ESI-MS Spectrum of 3 $\beta$ -[(3-((N',N''-Di(*tert*-butoxycarbonyl))guanidiny)propyl)carbamoyl]  
 $\beta$ -sitosterol (**12**)

WR-NMR186 Chopaka CT(1)-66 (9.1 mg, CDCl<sub>3</sub> + CD<sub>3</sub>OD 3 drops)

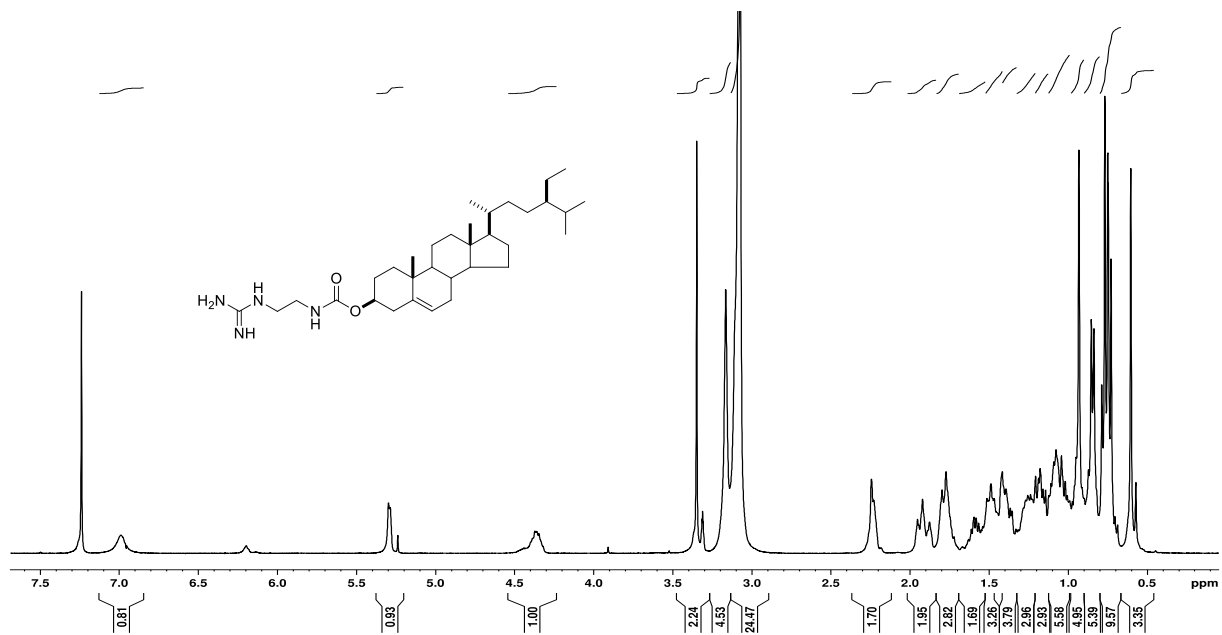

<sup>1</sup>H NMR Spectrum (400 MHz, CDCl<sub>3</sub>) of 3β-[(2-(Guanidiny)ethyl)carbamoyl]β-sitosterol (**3A**)

<sup>13</sup>C WR-NMR186 Chopaka CT(1)-66 (9.1 mg, CDCl<sub>3</sub> + 3 drops of CD<sub>3</sub>OD)

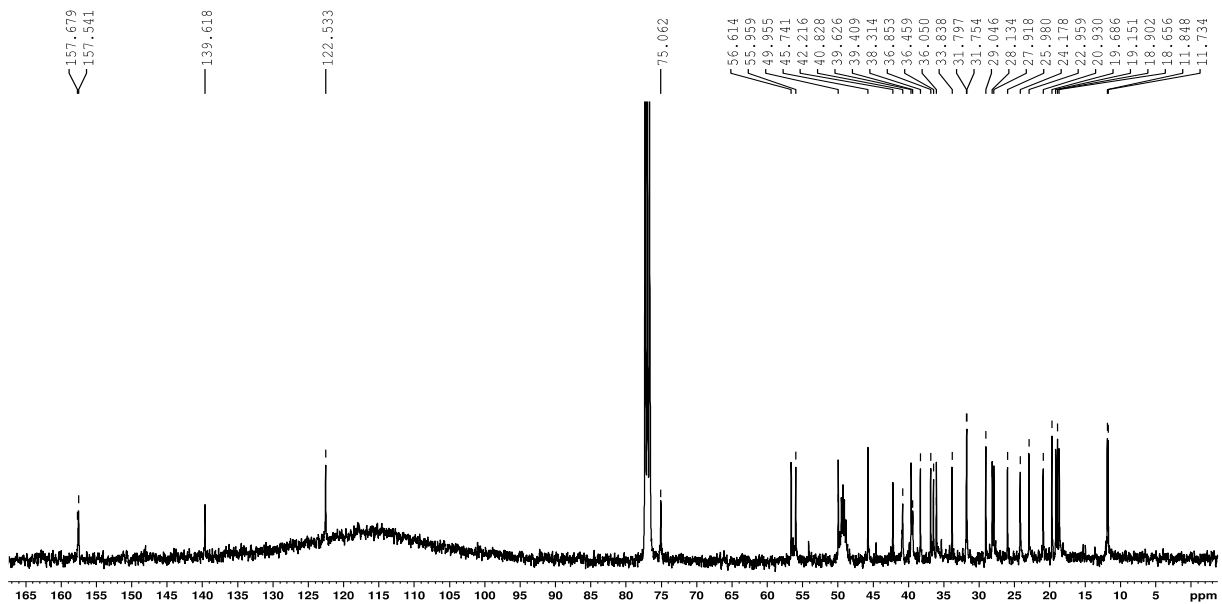

<sup>13</sup>C NMR Spectrum (100 MHz, CDCl<sub>3</sub>) of 3β-[(2-(Guanidiny)ethyl)carbamoyl]β-sitosterol (**3A**)

## Mass Spectrum SmartFormula Report

### Analysis Info

Analysis Name D:\Data\Boon-ek\ESI\BY-HRMS 196 (pos).d  
Method tune\_wide2.m  
Sample Name CT (1)-66  
Comment

Acquisition Date 6/29/2016 4:30:25 PM

Operator RU  
Instrument micrOTOF 8213750.10411

### Acquisition Parameter

|             |            |                      |          |                  |           |
|-------------|------------|----------------------|----------|------------------|-----------|
| Source Type | ESI        | Ion Polarity         | Positive | Set Nebulizer    | 0.5 Bar   |
| Focus       | Not active |                      |          | Set Dry Heater   | 180 °C    |
| Scan Begin  | 50 m/z     | Set Capillary        | 4500 V   | Set Dry Gas      | 4.0 l/min |
| Scan End    | 3000 m/z   | Set End Plate Offset | -500 V   | Set Divert Valve | Waste     |

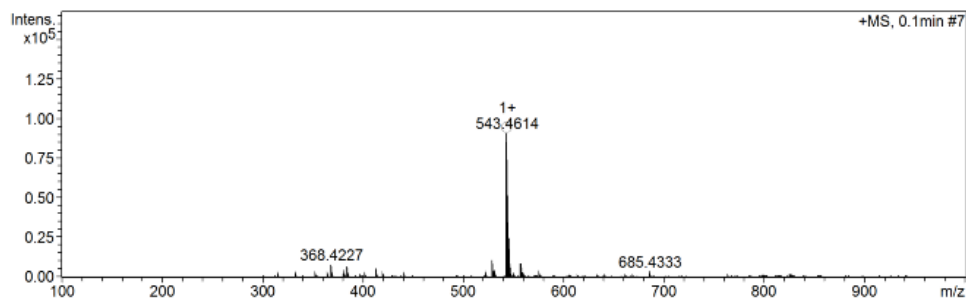

| Meas. m/z  | # | Ion Formula | m/z        | err  [mDa] | err [ppm] | Mean err [ppm] | rdb | N-Rule | e <sup>-</sup> Conf | mSigma |
|------------|---|-------------|------------|------------|-----------|----------------|-----|--------|---------------------|--------|
| 543.461429 | 1 | C33H59N4O2  | 543.463254 | 1.8        | 3.4       | 1.2            | 6.5 | ok     | even                | 105.8  |

HR-ESI-MS Spectrum of 3β-[(2-(Guanidiny)ethyl)carbamoyl]β-sitosterol (**3A**)

WR-NMR218 Chopaka CT(1)-67 (20.6 mg, CDCl<sub>3</sub> + 10 drops of CD<sub>3</sub>OD)

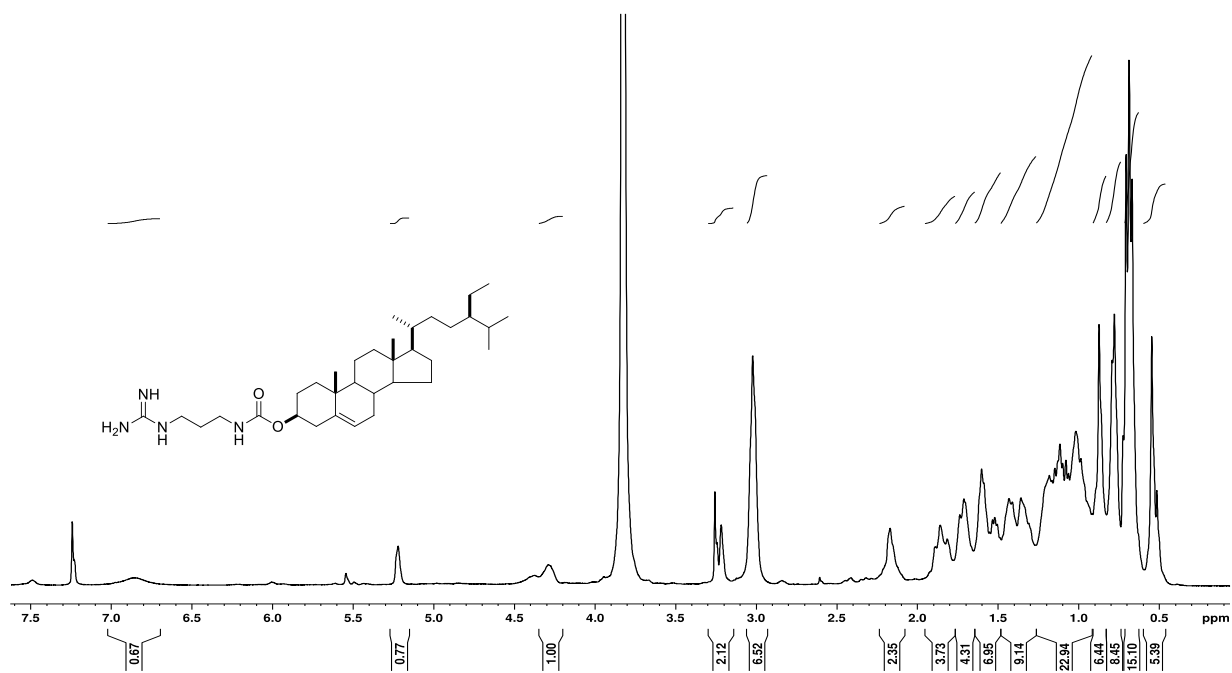

<sup>1</sup>H NMR Spectrum (400 MHz, CDCl<sub>3</sub>) of 3β-[(3-(Guanidiny)propyl)carbamoyl]β-sitosterol (**7A**)

13C WR-NMR128 Chopaka CT(1)-67 (20.6 mg, CDCl<sub>3</sub> + 10 drops of CD<sub>3</sub>OD)

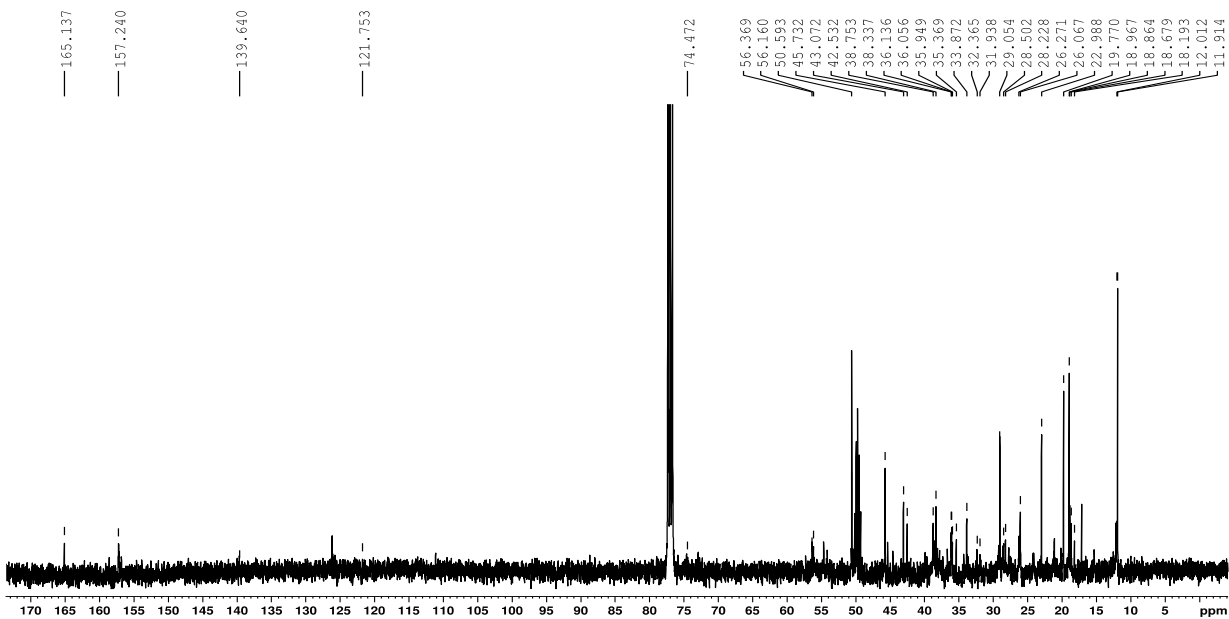

<sup>13</sup>C NMR Spectrum (100 MHz, CDCl<sub>3</sub>) of 3β-[(3-(Guanidiny)propyl)carbamoyl]β-sitosterol (**7A**)



## Mass Spectrum SmartFormula Report

### Analysis Info

Analysis Name D:\Data\Boon-ek\ESI\BY-HRMS 195 (pos).d  
Method tune\_wide2.m  
Sample Name CT (1)-67  
Comment

Acquisition Date 6/29/2016 4:26:55 PM

Operator RU  
Instrument micrOTOF 8213750.10411

### Acquisition Parameter

|             |            |                      |          |                  |           |
|-------------|------------|----------------------|----------|------------------|-----------|
| Source Type | ESI        | Ion Polarity         | Positive | Set Nebulizer    | 0.5 Bar   |
| Focus       | Not active |                      |          | Set Dry Heater   | 180 °C    |
| Scan Begin  | 50 m/z     | Set Capillary        | 4500 V   | Set Dry Gas      | 4.0 l/min |
| Scan End    | 3000 m/z   | Set End Plate Offset | -500 V   | Set Divert Valve | Waste     |

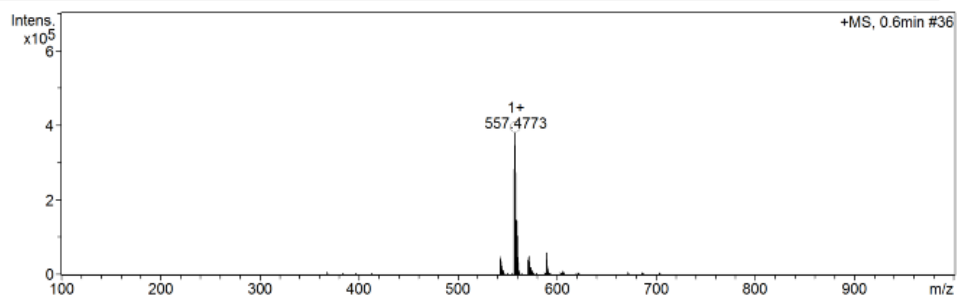

| Meas. m/z  | # | Ion Formula | m/z        | err  [mDa] | err [ppm] | Mean err [ppm] | rdb | N-Rule | e <sup>-</sup> Conf | mSigma |
|------------|---|-------------|------------|------------|-----------|----------------|-----|--------|---------------------|--------|
| 557.477305 | 1 | C34H61N4O2  | 557.478904 | 1.6        | -2.9      | -0.5           | 6.5 | ok     | even                | 162.5  |

HR-ESI-MS Spectrum of 3 $\beta$ -[(3-(Guanidinyl)propyl)carbamoyl] $\beta$ -sitosterol (**7A**)

WR-NMR182 Chopaka CT(1)-62 (10 mg, CDCl<sub>3</sub>)

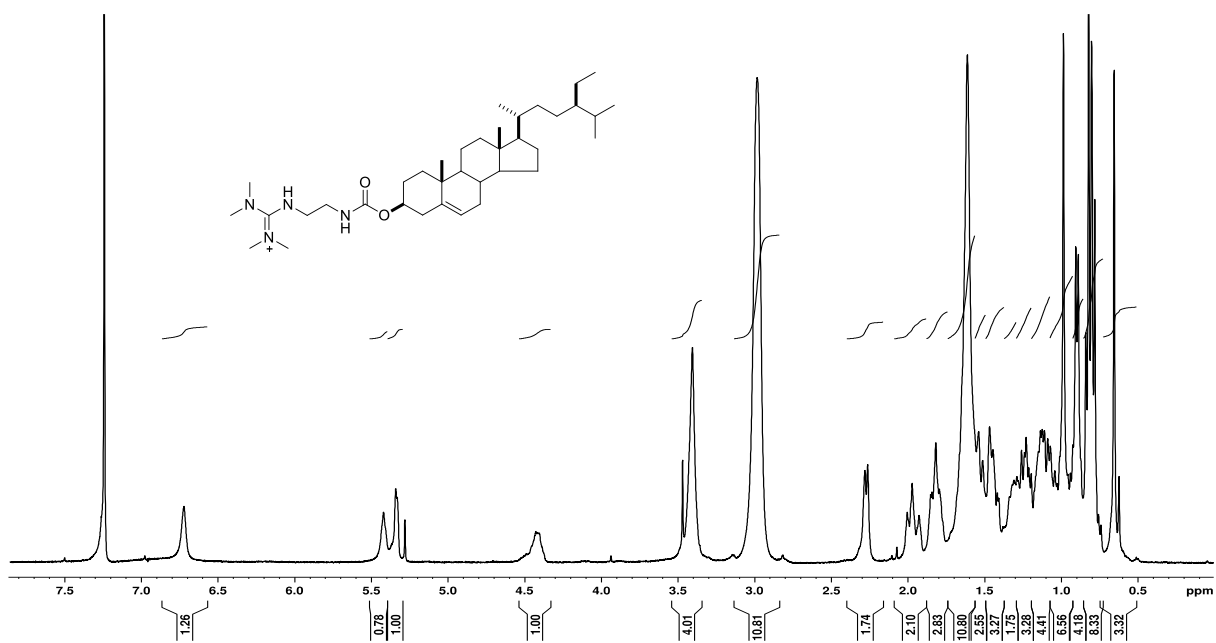

<sup>1</sup>H NMR Spectrum (400 MHz, CDCl<sub>3</sub>) of 3β-[(2-((*N'*, *N'*, *N''*, *N''*-Tetramethyl)guanidiny) ethyl)carbamoyl]β-sitosterol (**4A**)

13C WR-NMR182 Chopaka CT(1)-62 (10 mg, CDCl<sub>3</sub>)

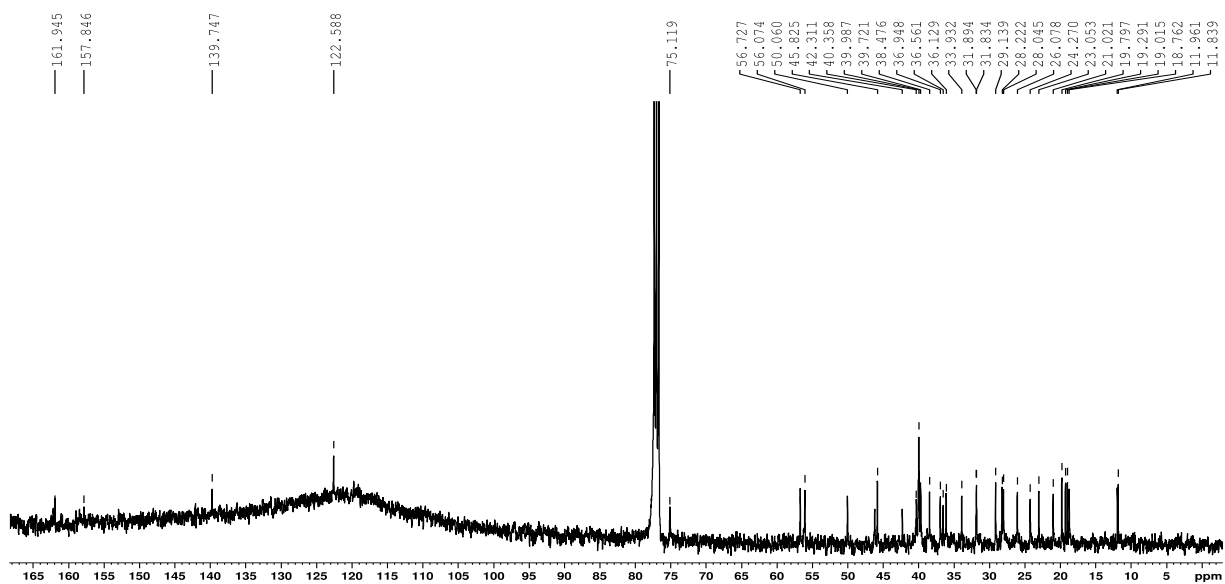

<sup>13</sup>C NMR Spectrum (100 MHz, CDCl<sub>3</sub>) of 3β-[(2-((*N'*, *N'*, *N''*, *N''*-Tetramethyl)guanidiny) ethyl)carbamoyl]β-sitosterol (**4A**)

## Mass Spectrum SmartFormula Report

### Analysis Info

Analysis Name D:\Data\Boon-ek\ESI\BY-HRMS 193 (pos).d  
Method tune\_wide2.m  
Sample Name CT (1)-62  
Comment

Acquisition Date 6/29/2016 4:20:15 PM

Operator RU  
Instrument micrOTOF 8213750.10411

### Acquisition Parameter

|             |            |                      |          |                  |           |
|-------------|------------|----------------------|----------|------------------|-----------|
| Source Type | ESI        | Ion Polarity         | Positive | Set Nebulizer    | 0.5 Bar   |
| Focus       | Not active |                      |          | Set Dry Heater   | 180 °C    |
| Scan Begin  | 50 m/z     | Set Capillary        | 4500 V   | Set Dry Gas      | 4.0 l/min |
| Scan End    | 3000 m/z   | Set End Plate Offset | -500 V   | Set Divert Valve | Waste     |

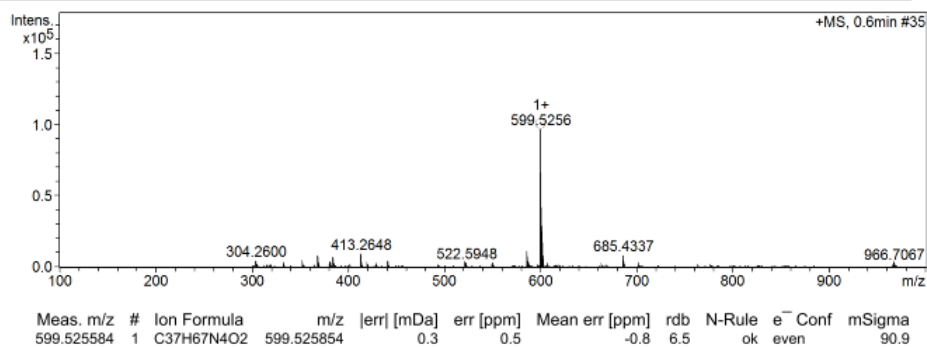

HR-ESI-MS Spectrum of  $3\beta$ -[(2-((*N'*, *N'*, *N''*, *N''*-Tetramethyl)guanidinyl) ethyl)carbamoyl] $\beta$ -sitosterol (**4A**)

WR-NMR183 Chopaka CT(1)-63 (9.8 mg, CDCl<sub>3</sub>)

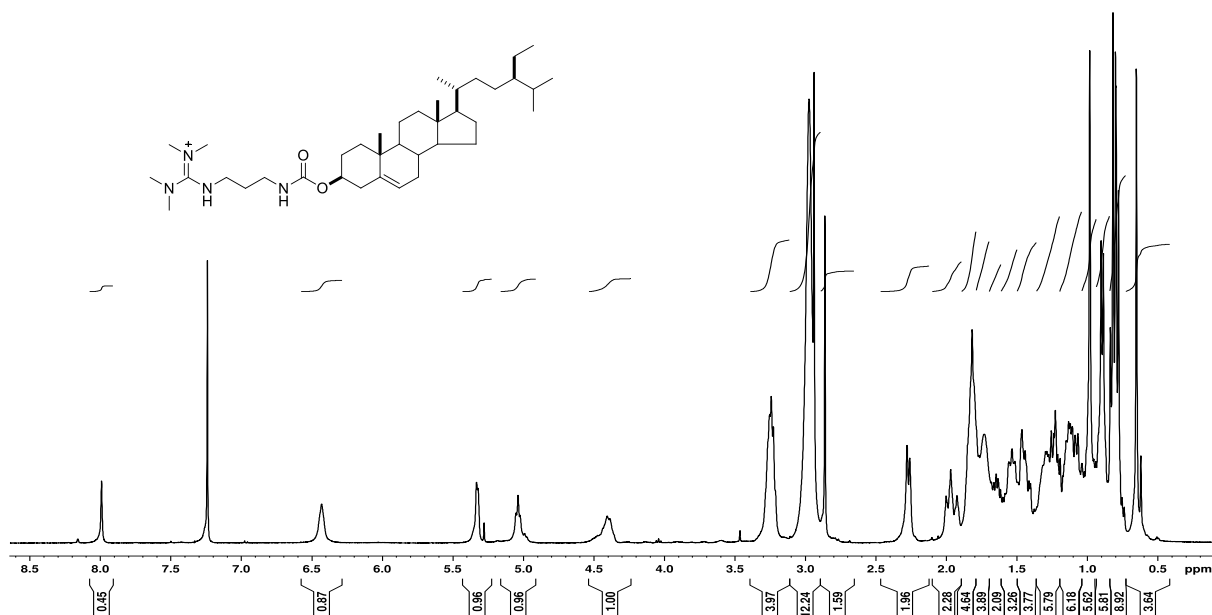

<sup>1</sup>H NMR Spectrum (400 MHz, CDCl<sub>3</sub>) of 3β-[(3-((N', N', N'', N''-Tetramethyl)guanidiny)propyl)carbamoyl]β-sitosterol (**8A**)

<sup>13</sup>C WR-NMR183 Chopaka CT(1)-63 (9.8 mg, CDCl<sub>3</sub>)

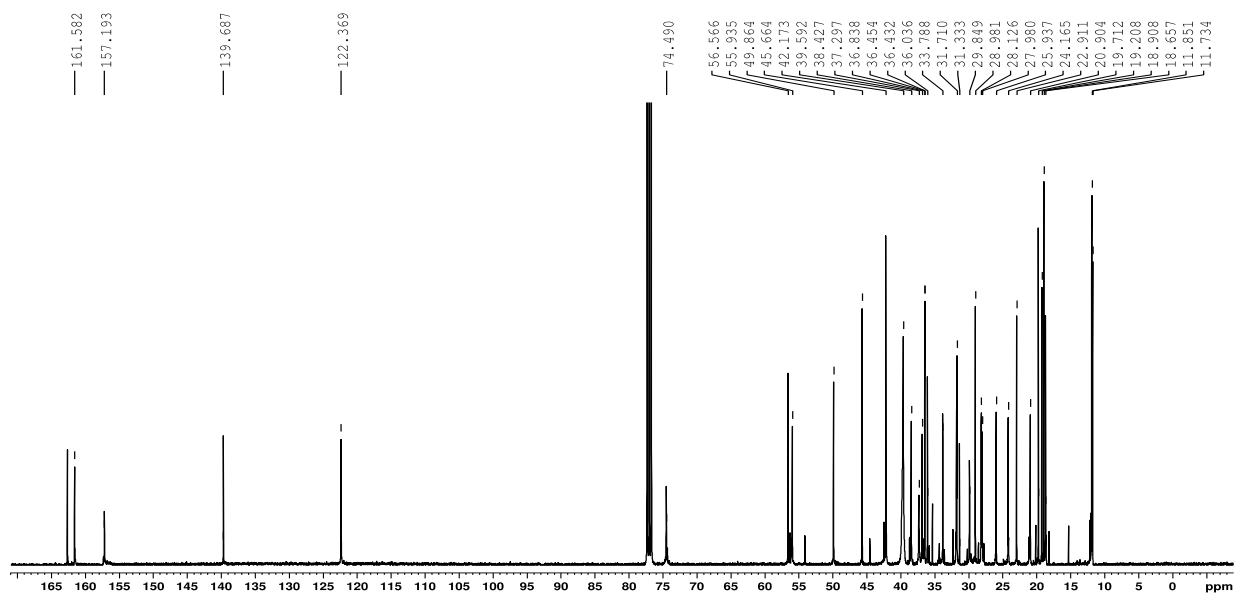

<sup>13</sup>C NMR Spectrum (100 MHz, CDCl<sub>3</sub>) of 3β-[(3-((N', N', N'', N''-Tetramethyl)guanidiny)propyl)carbamoyl]β-sitosterol (**8A**)

## Mass Spectrum SmartFormula Report

### Analysis Info

Analysis Name D:\Data\Boon-ek\ESI\BY-HRMS 194 (pos).d  
Method tune\_wide2.m  
Sample Name CT (1)-63  
Comment

Acquisition Date 6/29/2016 4:23:39 PM

Operator RU  
Instrument micrOTOF 8213750.10411

### Acquisition Parameter

|             |            |                      |          |                  |           |
|-------------|------------|----------------------|----------|------------------|-----------|
| Source Type | ESI        | Ion Polarity         | Positive | Set Nebulizer    | 0.5 Bar   |
| Focus       | Not active |                      |          | Set Dry Heater   | 180 °C    |
| Scan Begin  | 50 m/z     | Set Capillary        | 4500 V   | Set Dry Gas      | 4.0 l/min |
| Scan End    | 3000 m/z   | Set End Plate Offset | -500 V   | Set Divert Valve | Waste     |

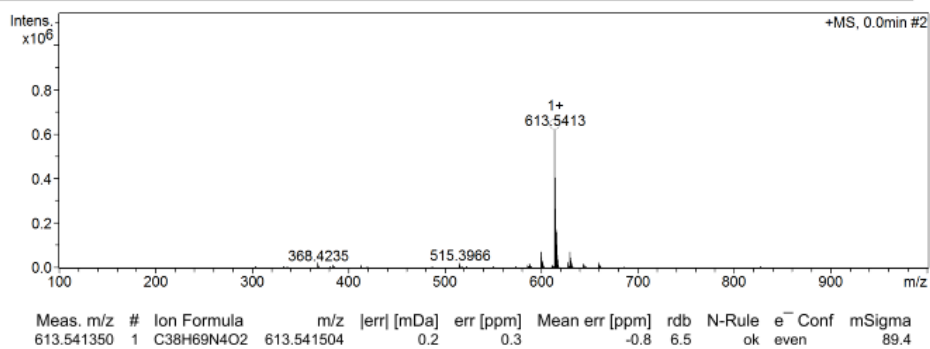

HR-ESI-MS Spectrum of 3 $\beta$ -[(3-((*N'*, *N'*, *N''*, *N''*-Tetramethyl)guanidiny) propyl)carbamoyl] $\beta$ -sitosterol (**8A**)

WR-NMR225 Chopaka CT(1)-93 (50.7 mg, CDC13)

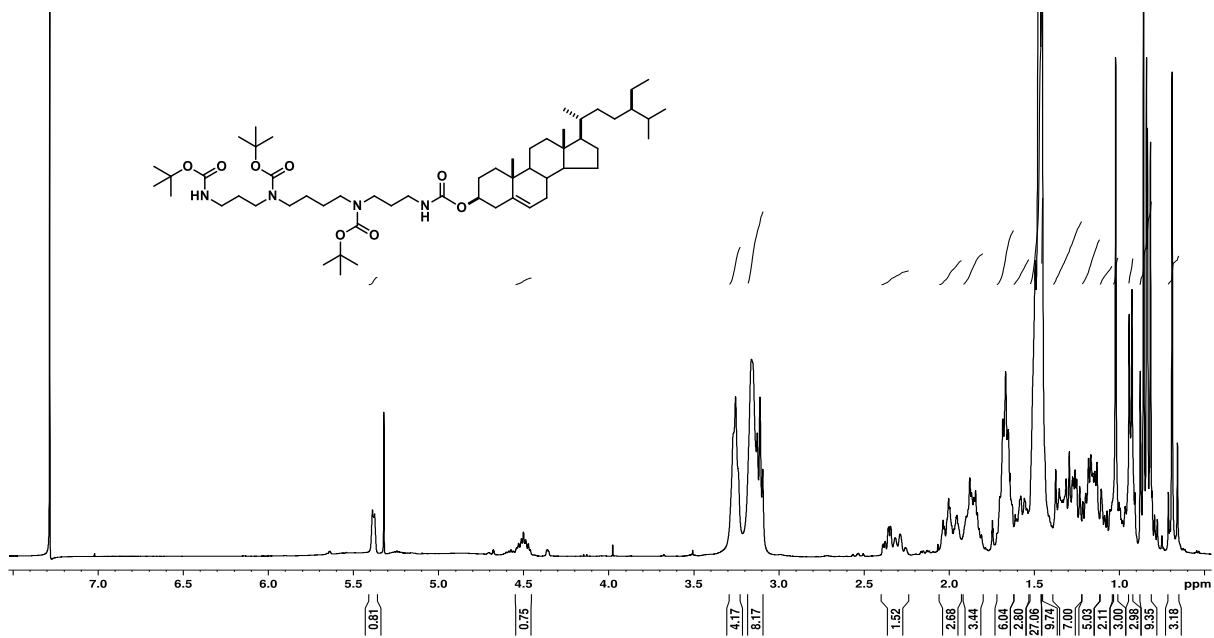

WR-NMR225 Chopaka CT(1)-93 (50.7 mg, CDC13)

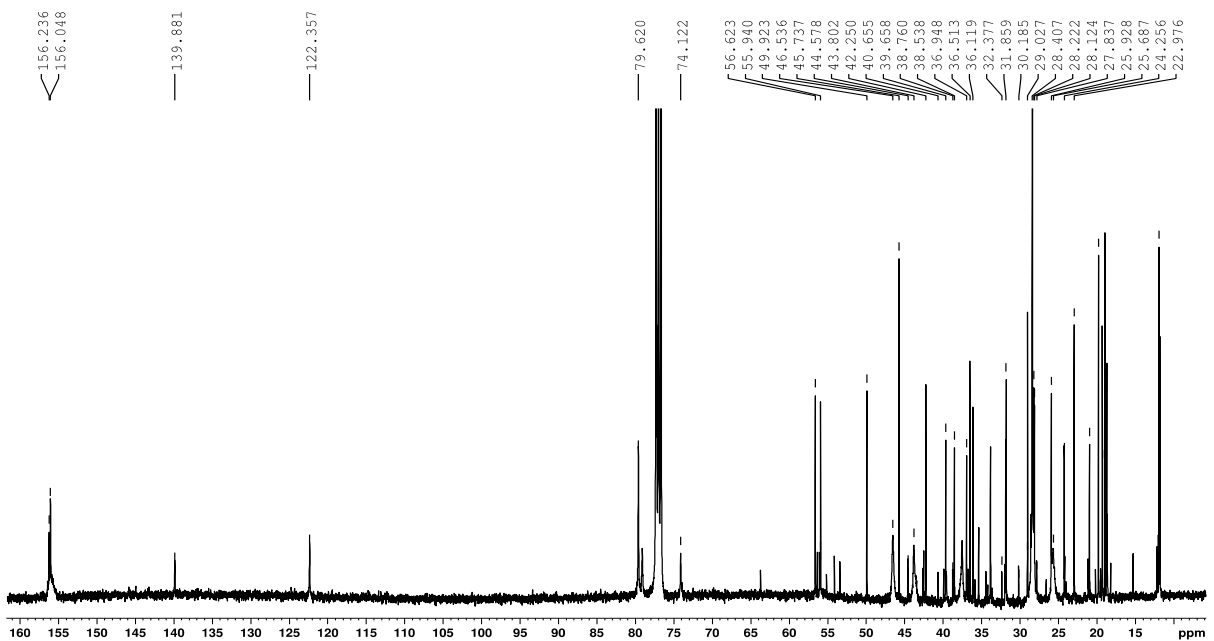

## Mass Spectrum SmartFormula Report

**Analysis Info**  
Analysis Name D:\Data\Boon-ek\ESI\BY-HRMS 205 (pos).d Acquisition Date 7/1/2016 12:27:20 PM  
Method tune\_wide2.m Operator RU  
Sample Name CT(1) -93 Instrument micrOTOF 8213750.10411  
Comment

**Acquisition Parameter**  
Source Type ESI Ion Polarity Positive Set Nebulizer 0.5 Bar  
Focus Not active Set Dry Heater 180 °C  
Scan Begin 50 m/z Set Capillary 4500 V Set Dry Gas 4.0 l/min  
Scan End 3000 m/z Set End Plate Offset -500 V Set Divert Valve Waste

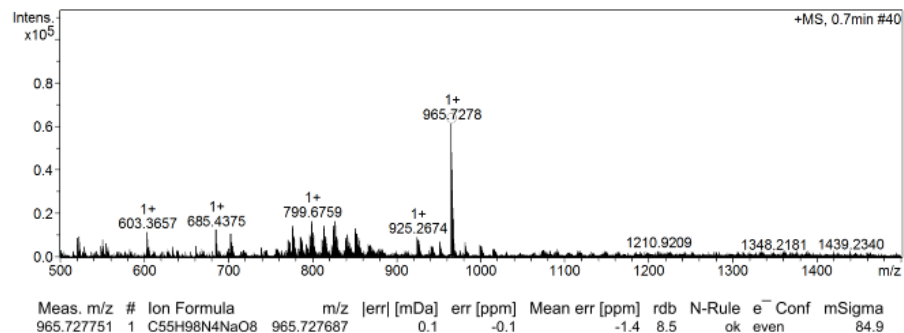

HR-ESI-MS Spectrum of  $3\beta$ -[( $N^5$ ,  $N^{10}$ ,  $N^{14}$ -Tri(*tert*-butyloxycarbonyl-( $N^1$ -sperminyl)))  
carbonyloxy] $\beta$ -sitosterol (**13**)

WR-NMR224 Chopaka CT(1)-93-2F1 (24.9 mg, CDCl<sub>3</sub> + CD<sub>3</sub>OD)

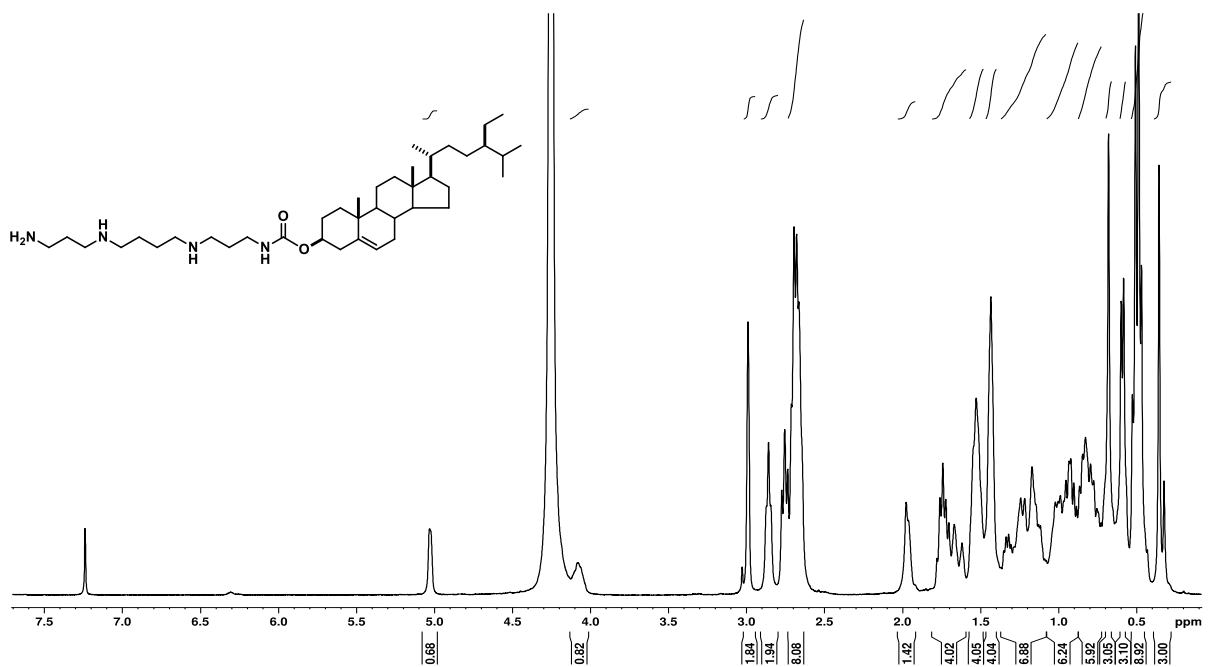

<sup>1</sup>H NMR Spectrum (400 MHz, CDCl<sub>3</sub>) of 3β-[(N<sup>1</sup>-Sperminyl)carbonyloxy]β-sitosterol (1B)

WR-NMR224 Chopaka (24.9 mg, CDCl<sub>3</sub> + CD<sub>3</sub>OD)

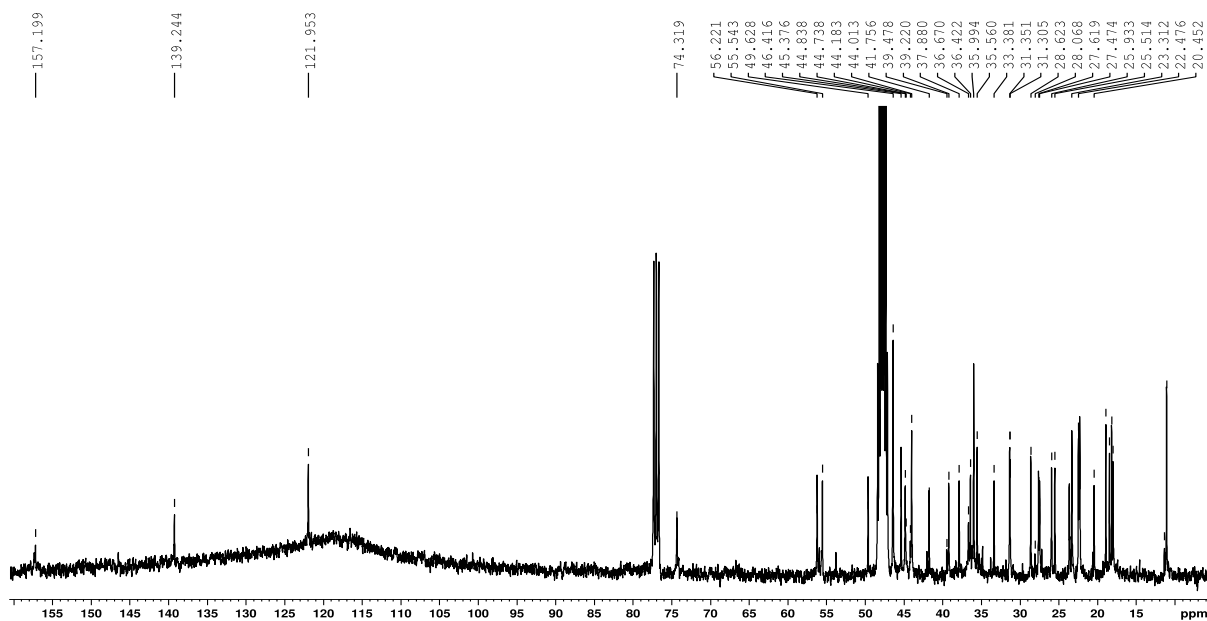

<sup>13</sup>C NMR Spectrum (100 MHz, CDCl<sub>3</sub>) of 3β-[(N<sup>1</sup>-Sperminyl)carbonyloxy]β-sitosterol (1B)



## Mass Spectrum SmartFormula Report

**Analysis Info**

Analysis Name D:\Data\Boon-ek\ESI\BY-HRMS 236 (pos).d  
 Method tune\_wide1.m  
 Sample Name CT(1)-93-2F1  
 Comment

Acquisition Date 11/23/2016 4:18:18 PM

Operator RU  
 Instrument micrOTOF 8213750.10411

**Acquisition Parameter**

|             |            |                      |          |                  |           |
|-------------|------------|----------------------|----------|------------------|-----------|
| Source Type | ESI        | Ion Polarity         | Positive | Set Nebulizer    | 0.5 Bar   |
| Focus       | Not active |                      |          | Set Dry Heater   | 180 °C    |
| Scan Begin  | 50 m/z     | Set Capillary        | 4500 V   | Set Dry Gas      | 4.0 l/min |
| Scan End    | 3000 m/z   | Set End Plate Offset | -500 V   | Set Divert Valve | Waste     |

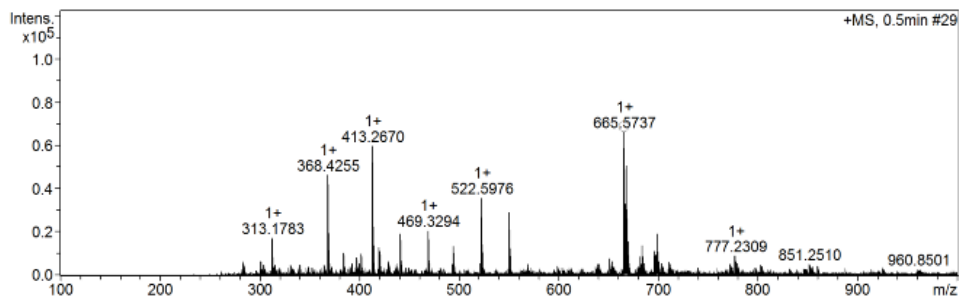

| Meas. m/z # Ion Formula   | m/z        | err [ppm] | Mean rdb err [ppm] | N-Rule e <sup>-</sup> Conf | mSigm   | Std I a | Std Mean m/z | Std VarNo m | Std m/z Diff | Std Comb Dev |       |
|---------------------------|------------|-----------|--------------------|----------------------------|---------|---------|--------------|-------------|--------------|--------------|-------|
| 665.573727 1 C40H74N4NaO2 | 665.570398 | 5.0       | -12.7              | 5.5                        | ok even | 381.6   | 379.9        | 9.7         | 170.2        | 6.5          | 891.3 |

HR-ESI-MS Spectrum of 3β-[(N<sup>1</sup>-Sperminyl)carbonyloxy]β-sitosterol (**1B**)

1R-NMR251 Chopaka CT(1)-100 (20.3 mg, CDCl<sub>3</sub>)

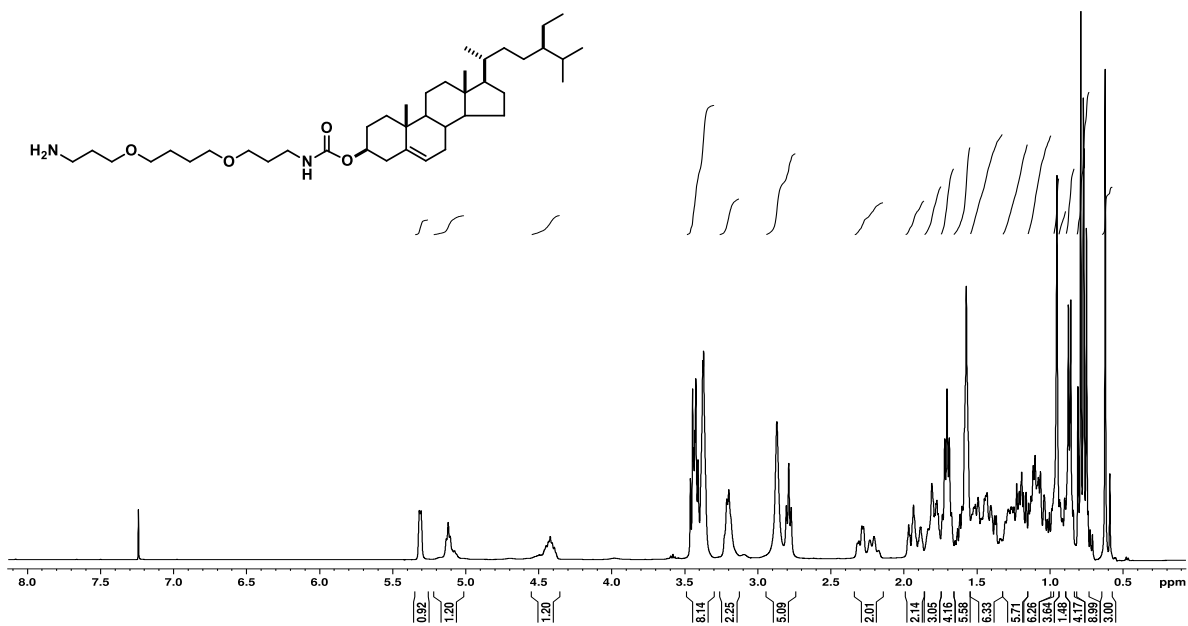

$^1\text{H}$  NMR Spectrum (400 MHz,  $\text{CDCl}_3$ ) of  $3\beta$ -[ $N^1$ -(1,4-Bis(3-aminopropoxy)butyl)carbonyloxy]  
 $\beta$ -sitosterol (**2B**)

1R-NMR251 Chopaka CT(1)-100 (20.3 mg, CDCl<sub>3</sub>)

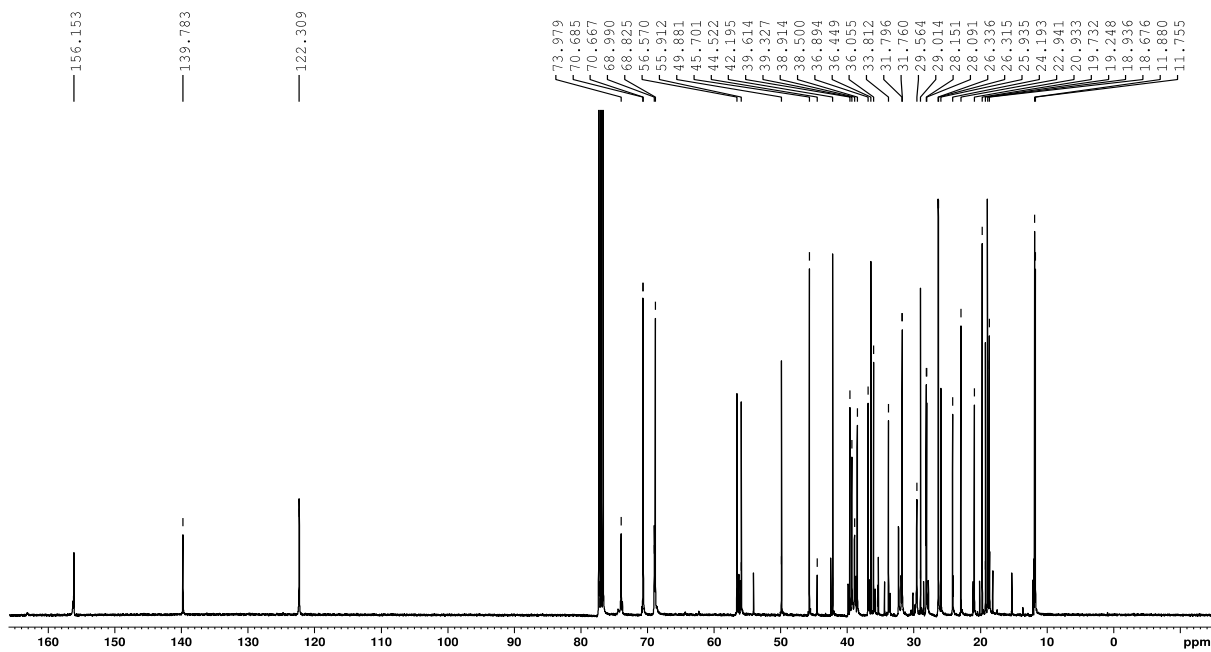

$^{13}\text{C}$  NMR Spectrum (100 MHz,  $\text{CDCl}_3$ ) of  $3\beta$ -[ $N^1$ -(1,4-Bis(3-aminopropoxy)butyl)carbonyloxy]  
 $\beta$ -sitosterol (**2B**)

## Mass Spectrum SmartFormula Report

### Analysis Info

Analysis Name D:\Data\Boon-ek\ESI\BY-HRMS 356 (pos).d  
Method tune\_wide 4 19-6-60.m  
Sample Name CT(1)-100  
Comment

Acquisition Date 7/20/2017 4:14:03 PM  
Operator RU  
Instrument micrOTOF 8213750.10411

### Acquisition Parameter

|             |            |                      |          |                  |           |
|-------------|------------|----------------------|----------|------------------|-----------|
| Source Type | ESI        | Ion Polarity         | Positive | Set Nebulizer    | 0.5 Bar   |
| Focus       | Not active |                      |          | Set Dry Heater   | 180 °C    |
| Scan Begin  | 50 m/z     | Set Capillary        | 4500 V   | Set Dry Gas      | 4.0 l/min |
| Scan End    | 3000 m/z   | Set End Plate Offset | -500 V   | Set Divert Valve | Waste     |

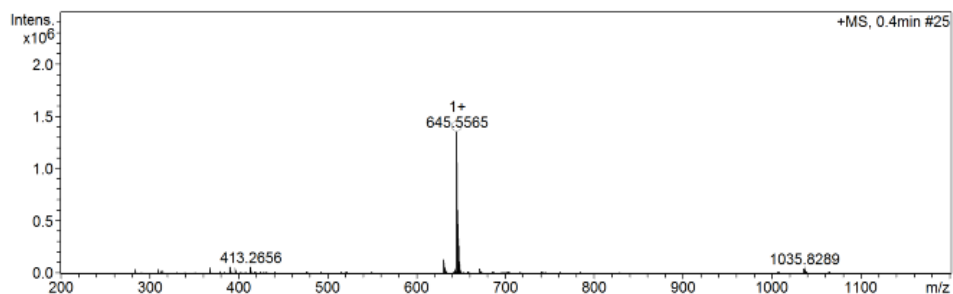

| Meas. m/z  | # | Ion Formula                                                   | m/z        | [err] [mDa] | err [ppm] | Mean err [ppm] | rdb | N-Rule | e <sup>-</sup> Conf | mSigma |
|------------|---|---------------------------------------------------------------|------------|-------------|-----------|----------------|-----|--------|---------------------|--------|
| 645.556454 | 1 | C <sub>40</sub> H <sub>73</sub> N <sub>2</sub> O <sub>4</sub> | 645.556485 | 0.0         | -0.0      | -1.1           | 5.5 | ok     | even                | 77.7   |

HR-ESI-MS Spectrum of  $3\beta$ -[*N*<sup>1</sup>-(1,4-Bis(3-aminopropoxy)butyl)carbonyloxy] $\beta$ -sitosterol (**2B**)

WR-NMR226 Chopaka CT(1)-96 (42.2 mg, CDCl<sub>3</sub>)

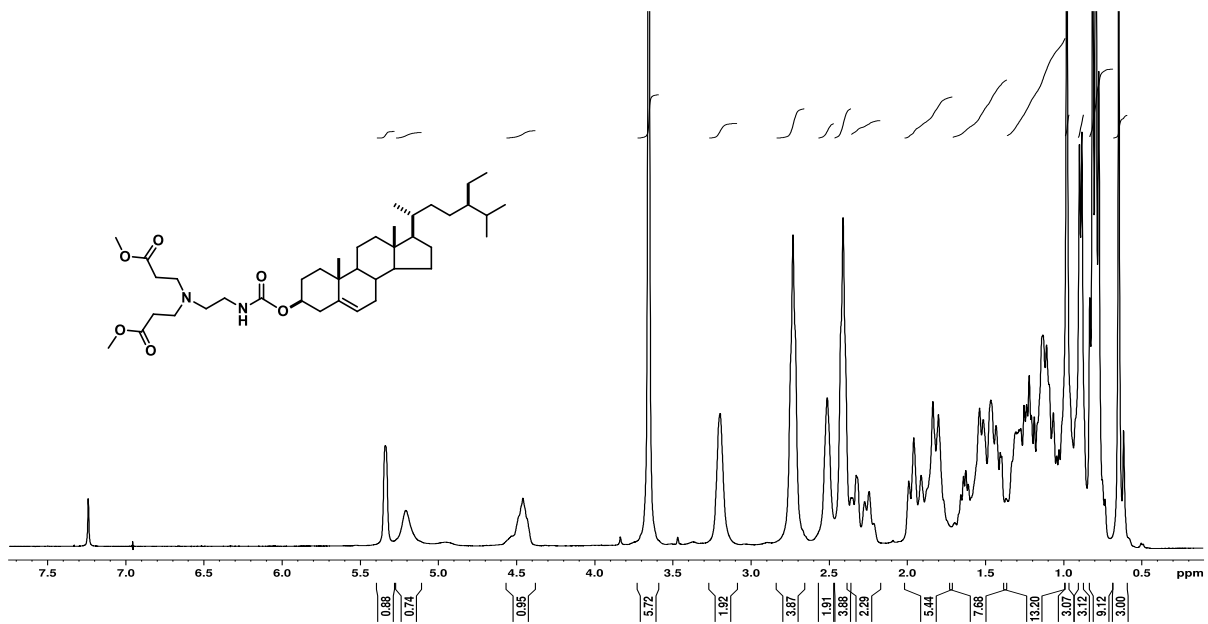

<sup>1</sup>H NMR Spectrum (400 MHz, CDCl<sub>3</sub>) of 3β-[N-(2-(N,N-Bis(methoxycarbonyl)ethyl)aminoethyl)carbamoyl]β-sitosterol (**14**)

WR-NMR226 Chopaka CT(1)-96 (42.2 mg, CDCl<sub>3</sub>)

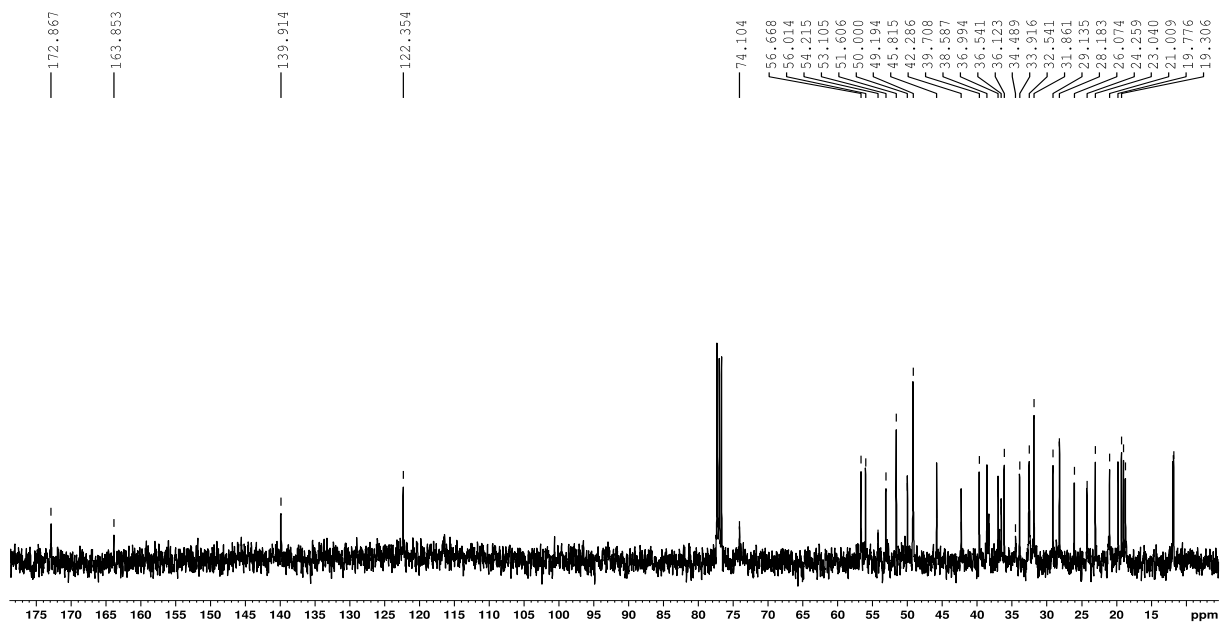

<sup>13</sup>C NMR Spectrum (400 MHz, CDCl<sub>3</sub>) of 3β-[N-(2-(N,N-Bis(methoxycarbonyl)ethyl)aminoethyl)carbamoyl]β-sitosterol (**14**)

## Mass Spectrum SmartFormula Report

### Analysis Info

Analysis Name D:\Data\Boon-ek\ESI\BY-HRMS 210 (pos).d  
Method tune\_wide2.m  
Sample Name CT(1) -96  
Comment

Acquisition Date 7/1/2016 12:47:51 PM

Operator RU  
Instrument micrOTOF 8213750.10411

### Acquisition Parameter

|             |            |                      |          |                  |           |
|-------------|------------|----------------------|----------|------------------|-----------|
| Source Type | ESI        | Ion Polarity         | Positive | Set Nebulizer    | 0.5 Bar   |
| Focus       | Not active |                      |          | Set Dry Heater   | 180 °C    |
| Scan Begin  | 50 m/z     | Set Capillary        | 4500 V   | Set Dry Gas      | 4.0 l/min |
| Scan End    | 3000 m/z   | Set End Plate Offset | -500 V   | Set Divert Valve | Waste     |

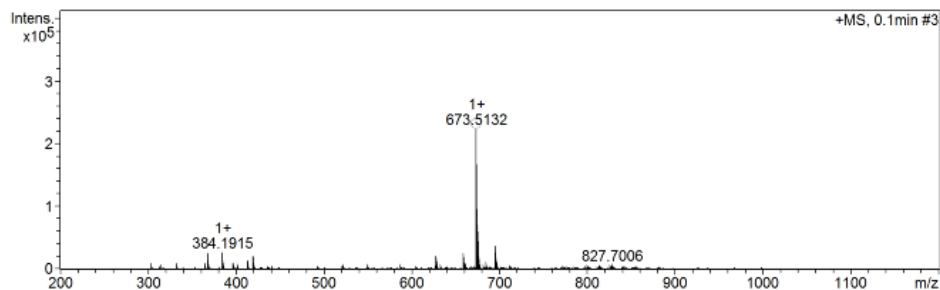

| Meas. m/z  | # | Ion Formula | m/z        | err  [mDa] | err [ppm] | Mean err [ppm] | rdb | N-Rule | e <sup>-</sup> Conf | mSigma |
|------------|---|-------------|------------|------------|-----------|----------------|-----|--------|---------------------|--------|
| 673.513240 | 1 | C40H69N2O6  | 673.515014 | 1.8        | -2.6      | 1.0            | 7.5 | ok     | even                | 86.3   |

HR-ESI-MS Spectrum of 3 $\beta$ -[*N*-(2-(*N,N*-Bis(methoxycarbonyl)ethyl)aminoethyl)carbamoyl] $\beta$ -sitosterol (**14**)

WR-NMR285 Chopaka CT(1)-109/2 (20.5 mg, CDCl<sub>3</sub> + CD<sub>3</sub>OD)

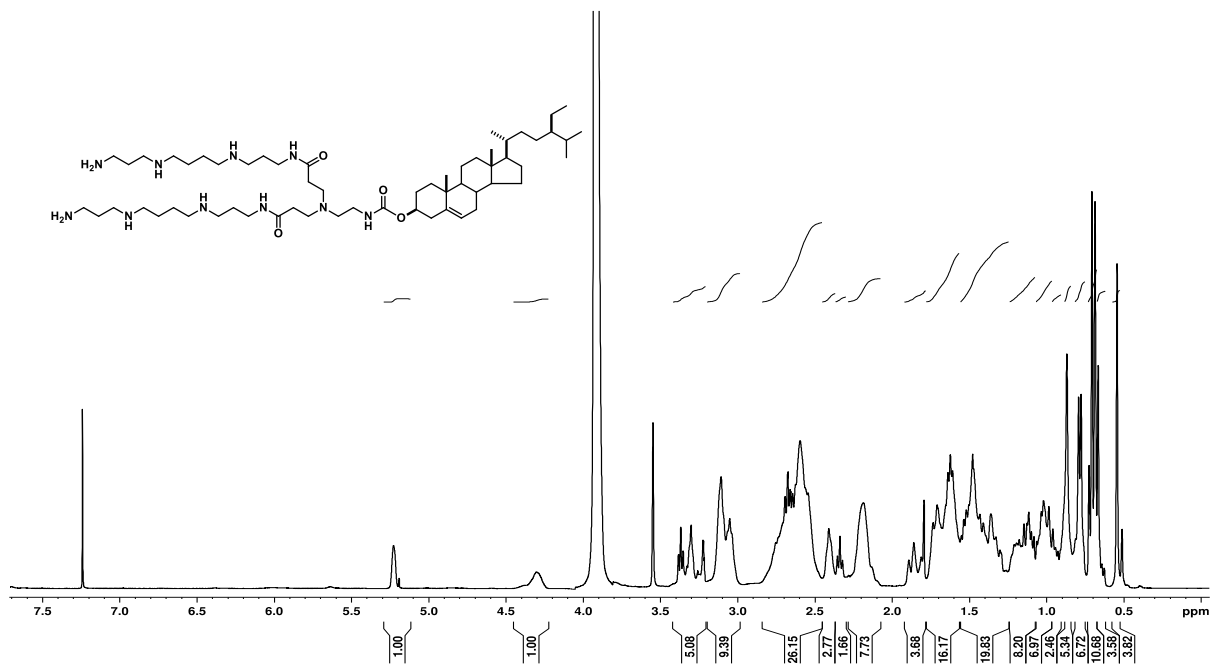

<sup>1</sup>H NMR Spectrum (400 MHz, CDCl<sub>3</sub>) of 3β[*N*-(2-(*N,N*-Bis(ethylcarbonyl(*N*<sup>1</sup>-sperminyl))) aminoethyl)carbamoyl]β-sitosterol (**3B**)

WR-NMR285 Chopaka CT(1)-109/2 (20.5 mg, CDCl<sub>3</sub> + CD<sub>3</sub>OD)

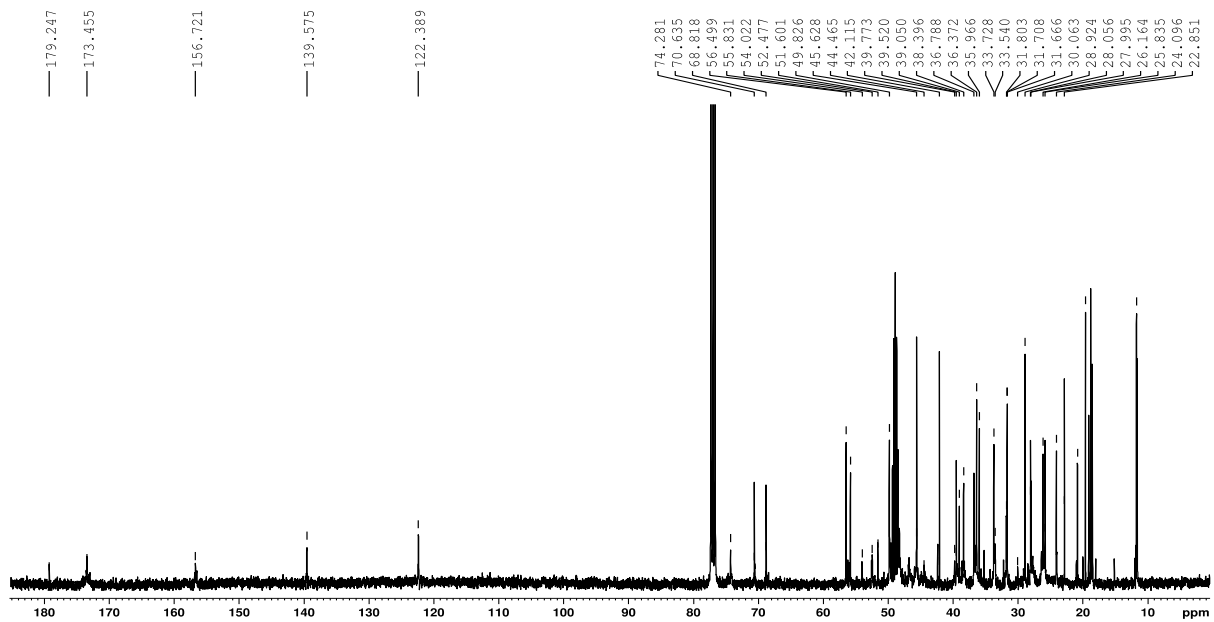

<sup>13</sup>C NMR Spectrum (100 MHz, CDCl<sub>3</sub>) of 3β[*N*-(2-(*N,N*-Bis(ethylcarbonyl(*N*<sup>1</sup>-sperminyl))) aminoethyl)carbamoyl]β-sitosterol (**3B**)

## Mass Spectrum SmartFormula Report

**Analysis Info**

|               |                                         |                  |                        |
|---------------|-----------------------------------------|------------------|------------------------|
| Analysis Name | D:\Data\Boon-ek\ESI\BY-HRMS 358 (pos).d | Acquisition Date | 7/20/2017 4:18:03 PM   |
| Method        | tune_wide 4 19-6-60.m                   | Operator         | RU                     |
| Sample Name   | CT(1)-109/2                             | Instrument       | micrOTOF 8213750.10411 |
| Comment       |                                         |                  |                        |

**Acquisition Parameter**

|             |            |                      |           |
|-------------|------------|----------------------|-----------|
| Source Type | ESI        | Ion Polarity         | Positive  |
| Focus       | Not active | Set Nebulizer        | 0.5 Bar   |
| Scan Begin  | 50 m/z     | Set Dry Heater       | 180 °C    |
| Scan End    | 3000 m/z   | Set Dry Gas          | 4.0 l/min |
|             |            | Set End Plate Offset | -500 V    |
|             |            | Set Divert Valve     | Waste     |

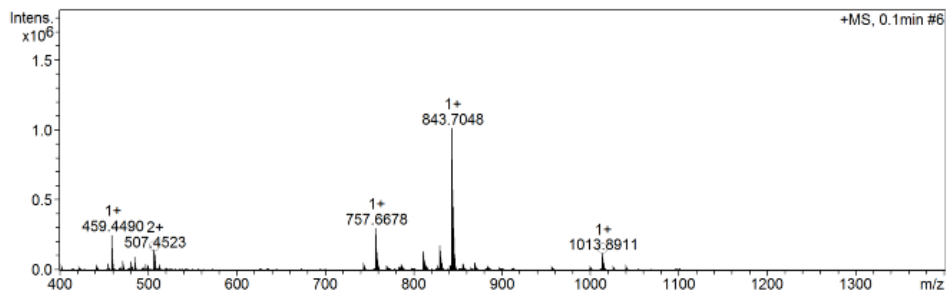

| Meas. m/z   | # | Ion Formula  | m/z         | err  [mDa] | err [ppm] | Mean err [ppm] | rdb | N-Rule | e <sup>-</sup> Conf | mSigma |
|-------------|---|--------------|-------------|------------|-----------|----------------|-----|--------|---------------------|--------|
| 507.452307  | 1 | C58H114N10O4 | 507.450678  | 1.6        | -3.2      | -3.2           | 7.0 | ok     | even                | 93.9   |
| 1013.891099 | 1 | C58H113N10O4 | 1013.894079 | 3.0        | 2.9       | 3.1            | 7.5 | ok     | even                | 75.5   |

HR-ESI-MS Spectrum of 3β[*N*-(2-(*N,N*-Bis(ethylcarbonyl(*N*<sup>1</sup>-sperminyl)))aminoethyl) carbamoyl]β-sitosterol (**3B**)

WR-NMR283 Chopaka CT(1)-107/2 (8 mg, CDC13)

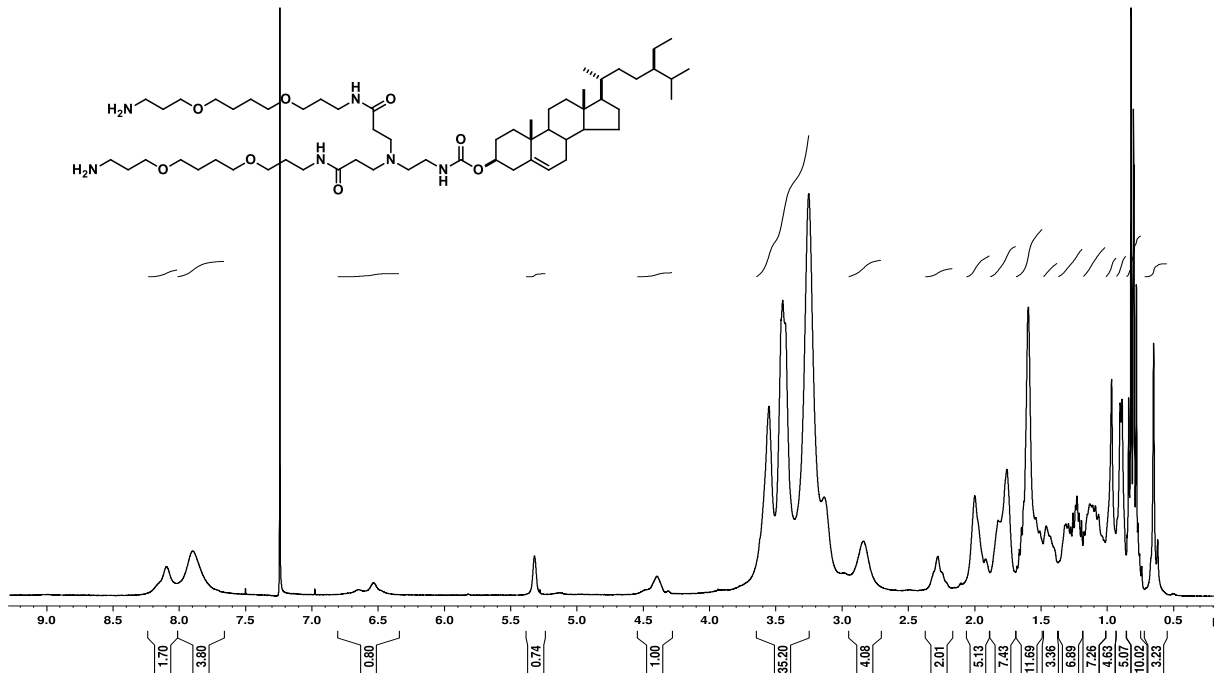

<sup>1</sup>H NMR Spectrum (400 MHz, CDCl<sub>3</sub>) of 3β[*N*-(2-(*N,N*-Bis(ethylcarbonyl(*N*<sup>1</sup>-1,4-bis(3-aminopropoxy)butyl))))aminoethyl) carbamoyl]β-sitosterol (**4B**)

WR-NMR283 Chopaka CT(1)-107/2 (8 mg, CDC13)

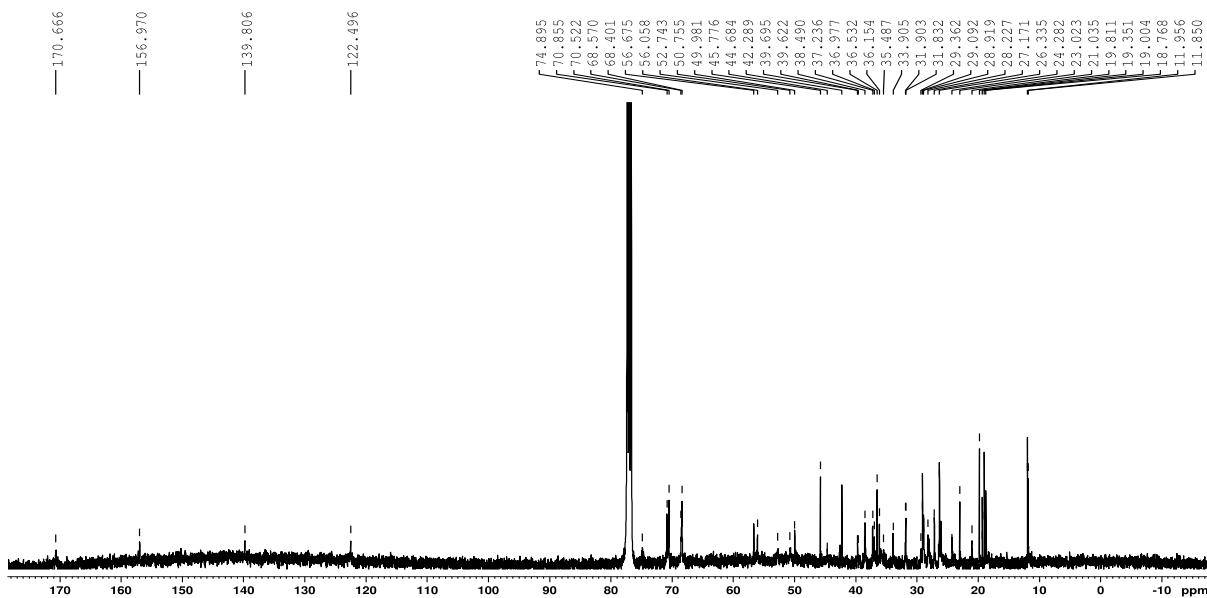

<sup>13</sup>C NMR Spectrum (100 MHz, CDCl<sub>3</sub>) of 3β[*N*-(2-(*N,N*-Bis(ethylcarbonyl(*N*<sup>1</sup>-1,4-bis(3-aminopropoxy)butyl))))aminoethyl) carbamoyl]β-sitosterol (**4B**)



## Mass Spectrum SmartFormula Report

### Analysis Info

Analysis Name D:\Data\Boon-ek\ESI\BY-HRMS 357 (pos).d  
 Method tune\_wide 4 19-6-60.m  
 Sample Name CT(1)-107/2  
 Comment

Acquisition Date 7/20/2017 4:16:03 PM

Operator RU  
 Instrument micrOTOF 8213750.10411

### Acquisition Parameter

|             |            |                      |          |                  |           |
|-------------|------------|----------------------|----------|------------------|-----------|
| Source Type | ESI        | Ion Polarity         | Positive | Set Nebulizer    | 0.5 Bar   |
| Focus       | Not active |                      |          | Set Dry Heater   | 180 °C    |
| Scan Begin  | 50 m/z     | Set Capillary        | 4500 V   | Set Dry Gas      | 4.0 l/min |
| Scan End    | 3000 m/z   | Set End Plate Offset | -500 V   | Set Divert Valve | Waste     |

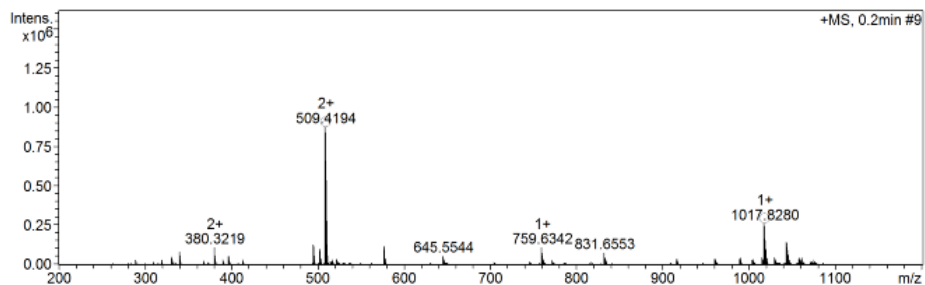

| Meas. m/z   | # | Ion Formula | m/z         | err  [mDa] | err [ppm] | Mean err [ppm] | rdb | N-Rule | e <sup>-</sup> | Conf | mSigma |
|-------------|---|-------------|-------------|------------|-----------|----------------|-----|--------|----------------|------|--------|
| 509.419393  | 1 | C58H110N6O8 | 509.418709  | 0.7        | -1.3      | -1.8           | 7.0 | ok     | even           |      | 86.7   |
| 1017.828011 | 1 | C58H109N6O8 | 1017.830141 | 2.1        | -2.1      | 0.8            | 7.5 | ok     | even           |      | 78.0   |

HR-ESI-MS Spectrum of  $3\beta$ [*N*-(2-(*N,N*-Bis(ethylcarbonyl(*N*<sup>1</sup>-1,4-bis(3-aminopropoxy)butyl)))) aminoethyl)carbamoyl] $\beta$ -sitosterol (**4B**)
